# Supplementary material for: TheYABBYGenes of Leaf and Leaf-Like Organ Polarity in Leafless PlantMonotropa hypopitys
Source: Hindawi journal article supplement (doi:10.1155/2018/7203469), 2018-01-01

## **The *YABBY* genes of leaf and leaf-like organ polarity in leafless plant *Monotropa hypopitys***

Anna V. Shchennikova<sup>1,\*</sup>, Marya A. Slugina<sup>1,2</sup>, Alexey V. Beletsky<sup>1</sup>, Mikhail A. Filyushin<sup>1</sup>, Andrey A. Mardanov<sup>1</sup>, Olga A. Shulga<sup>1</sup>, Elena Z. Kochieva<sup>1,2</sup>, Nikolay V. Ravin<sup>1</sup>, Konstantin G. Skryabin<sup>1,2</sup>

<sup>1</sup> Federal State Institution "Federal Research Centre "Fundamentals of Biotechnology" of the Russian Academy of Sciences", Moscow 119071, Russia

<sup>2</sup> Lomonosov Moscow State University, Moscow 119991, Russia

\*Corresponding author: e-mail: [shchennikova@yandex.ru](mailto:shchennikova@yandex.ru)

Structural analysis of the *MhyYABBY* genes and encoded proteins.

Supplementary Figure 1: Alignment of *M. hypopitys YABBY* genes (a) and encoded putative proteins (b).

Supplementary Figure 2: Novel amino acid motifs predicted in the sequence of the *MhyYABBY* proteins. a–g – Logos created from aligned sequences and copied directly from MEME graphically represent amino acid conservation: FIL-H (a); FIL-I (b); YAB5-Cm (c); CRC-E (d); INO-B (e); INO-C (f); INO-D (g). The height of the letters in each stack indicates relative frequency of individual residues at the position

Figure 1

a

```
MhyYABBY5 : ATGTCCTCCTCAAATTCCTTTTTCACCGGAACACCAAACCACCCCACCAGCATCTCTCCCCTCCTCCTCG-ATCAGC : 79
MhyYABBY6 : ATGTCCTCCTCAAATTCCTTATTCACCGAACACCAAACCACTCCAC-----TCCCCCACTCCTCCTCG-ACCAGC : 73
MhyYABBY2 : ATGTCCTCCTCAAATTCCTTATTCACCGAACACCAAACCACTCCAC-----TCCCCCACTCCTCCTCG-ACCAGC : 73
MhyYABBY7 : -----ATGTCCAGC-----TGCCGCCGATGTGCCCGGGCAAC : 34
MhyYABBY1 : -----ATGGGTGATAAAGCTCAATGGATTGGTTCCCCAGCTGACAATC : 46
MhyYABBY3 : -----ATGTCTACACTACACCGAACCGAGTCTTGGACCTTCAAGAACAGA : 46
MhyYABBY4 : -----ATGTCTACACTACACCGAACCGAGTCTTGGACCTTCAAGAACAGA : 46
                               a       a   c a c           c           C   c   A c A

MhyYABBY5 : TCTGTACGTCCAATGCAACATCTGTGACACTGTCTCGCGGTGAGCGTGCCCTTGCTCAAGCTTGTTCCAAGACTGCGACG : 159
MhyYABBY6 : TCTGTACGTCCAATGCAACATCTGTGACACTGTCTCGCGGTGAGCGTGCCCTTGCTCAAGCTTGTTCCAAGACTGCGACG : 153
MhyYABBY2 : TCTGTACGTCCAATGCAACATCTGTGACACTGTCTCGCGGTGAGCGTGCCCTTGCTCAAGCTTGTTCCAAGACTGCGACG : 153
MhyYABBY7 : TTTGCTACATACCTTGCAATTTTGCACATAGTCTTGCGGTGAGTGCCATGCAGTAGCTTATTTGACACAGTTACC : 114
MhyYABBY1 : TATGCTATGTCCGTGCAACTTTGCACACTGTCTTGCGTGGTGGATACCATGCAAAGGTTGCTGATACAGTGACA : 126
MhyYABBY3 : TCTGCTACGTCCAATGCGGTTATGCACTACCATTTTACTGGTAGGTGCCATGTTGACAATGGTGGTTACA : 126
MhyYABBY4 : TCTGCTACGTCCAATGCGGTTATGCACTACCATTTTACTGGTAGGTGCCATGTTGACAATGGTGGTTACA : 126
T T G T A c g t C T G C           T G           A c T T G G T G g T g C C T G           A G T T g           G A C

MhyYABBY5 : GTTCGATGCGGCCACTGCAACAGTCTCTTTCTGTGAACATTCGTGGCCTTCTCTTTCCTCAACCTAACCAACTCCATCA : 239
MhyYABBY6 : GTTCGATGCGGCCACTGCAACAGTCTCTTTCTGTGAACATTCGTGGCCTTCTCTTTCCTCAACCTAACCAACTCCATCA : 233
MhyYABBY2 : GTTCGATGCGGCCACTGCAACAGTCTCTTTCTGTGAACATTCGTGGCCTTCTCTTTCCTCAACCTAACCAACTCCATCA : 233
MhyYABBY7 : GTCCGATGCGGCCACTGCAACAGTCTCTTTCTGTGAACATTCGTGGCCTTCTCTTTCCTCAACCTAACCAACTCCATCA : 183
MhyYABBY1 : GTGAAATGCGGCCACTGCAACAGTCTCTTTCTGTGAACATTCGTGGCCTTCTCTTTCCTCAACCTAACCAACTCCATCA : 180
MhyYABBY3 : GTAAGATGCGGCCACTGCAACAGTCTCTTTCTGTGAACATTCGTGGCCTTCTCTTTCCTCAACCTAACCAACTCCATCA : 206
MhyYABBY4 : GTAAGATGCGGCCACTGCAACAGTCTCTTTCTGTGAACATTCGTGGCCTTCTCTTTCCTCAACCTAACCAACTCCATCA : 206
G T g a T G C G G C a C T G C a c C T c T c t g T A C a t           t t           a c           t

MhyYABBY5 : TCTTGGCAATTCATTATTTTCCCTCAGAATC----TTCTGGAGGAGATCCGAA-GCTCGACCCCAAACTTGTTGATCAA : 314
MhyYABBY6 : TCTTGGCAATTCATTATTTTCCCTCAGAATC----TTCTGGAGGAGATCCGAA-GCTCGACCCCAAACTTGTTGATCAA : 308
MhyYABBY2 : TCTTGGCAATTCATTATTTTCCCTCAGAATC----TTCTGGAGGAGATCCGAA-GCTCATCCCAAACTTGTTGATCAA : 308
MhyYABBY7 : TTTCAAGGAC-CAAACTATGTCCTCCGGAT----TGCCAGATTGATTTTG-GTTCATCATCCAATGCACGACAA : 254
MhyYABBY1 : CAAGGGCAAT-GTTTTGATCATCAAACA----GTTTCAGGGTTTTGGGCCATTCCGCAGTGAAATGAACAAGGGA : 252
MhyYABBY3 : TGTCAGCCAAAGATCAGATGCCAAAACAAGTACCTAGTTCTTTGTGAAGAAGCAGATGCCAAATGAAAGGCATCAGATA : 286
MhyYABBY4 : TGTCAGCCAAAGATCAGATGCCAAAACAAGTACCTAGTTCTTTGTGAAGAAGCAGATGCCAAATGAAAGGCATCAGATA : 286
t t G c A           t           C a           t t t           g           C           A A           A A

MhyYABBY5 : CC--AGCCTACCAAAGTGAACCATTCACA-GCGGTTCGAGGGTTTGTAGACCTTCCTAACCCCGGCGCTAACAGA : 390
MhyYABBY6 : CC--AGCCTACCAAAGTGAACCATTCACA-GCGGTTCGAGGGTTTGTAGACCTTCCTAACCCCGGCGCTAACAGA : 384
MhyYABBY2 : TC--AGCCTACCAAAGTGAACCATTCACA-GCGGTTCGAGGGTTTGTAGACCTTCCTAACCCCGGCGCTAACAGA : 384
MhyYABBY7 : CA--TGACTACCGCA--CCACCGATCATA-GCAAT-----AACAACGAGGGAG-----GGCTGCAATTCGA : 312
MhyYABBY1 : C--AGTCTTCTCATCATCTTCAAGCG-A-GCCACTC-----TCCCCTAGAGCACC----TTTTGTGTGAAA : 312
MhyYABBY3 : GACGGAGCCCATCGCTGGTCACTCTCTCGGATGACGATGAAGAAGACGTTTTAGTCCCAATGAATCATATTGTGAATAGG : 366
MhyYABBY4 : GACGGAGCCCATCGCTGGTCACTCTCTCGGATGACGATGAAGAAGACGTTTTAGTCCCAATGAATCATATTGTGAATAGG : 366
a g C           t c A g           t t           a g           G a a a g

MhyYABBY5 : CCTCCGGAGAAGACACAGAGAGTCCCATCTGCTTACAACCGCTTTCATCAAGGACGAGATCCAACGCATCAAAGCTGGGAA : 470
MhyYABBY6 : CCTCCGGAGAAGACACAGAGAGTCCCATCTGCTTACAACCGCTTTCATCAAGGACGAGATCCAACGCATCAAAGCTGGGAA : 464
MhyYABBY2 : CCTCCGGAGAAGACACAGAGAGTCCCATCTGCTTACAACCGCTTTCATCAAGGACGAGATCCAACGCATCAAAGCTGGGAA : 464
MhyYABBY7 : CCTCCGGAGAAGACACAGAGAGTACCTTCTGCATATAATCAGTTTATAAAAAGAGATACAGAGGATCAAAGCCAAATAA : 392
MhyYABBY1 : CCACCAGAGAAGAACACAGGCTCCCATCTGCCTCAACCGATTTCATGAAGGAGGAGATACAGCGCATCAAAGCGGCCAA : 392
MhyYABBY3 : CCACCAGAGAAGAGCAGCGGGCCCCATCAGCTTACAACAACTTCATCAAAGAGGAAATCAGAAGGCTAAAGGGGAAACA : 446
MhyYABBY4 : CCACCAGAGAAGAGCAGCGGGCCCCATCAGCTTACAACAACTTCATCAAAGAGGAAATCAGAAGGCTAAAGGGGAAACA : 446
C C C G A G A A G a C a g G g c C c a T C G C T a C a A c           T T c a T A A G A G A A T           G T A A G           A

MhyYABBY5 : TCCCGACATAAGTCAAGGGAGGCGTTCACTGCCGCTGCAAAAGAATTGGGCC---ACTTCCCCACATTCATTTCGGAC : 547
MhyYABBY6 : TCCCGACATAAGTCAAGGGAGGCGTTCACTGCCGCTGCAAAAGAATTGGGCC---ACTTCCCCACATTCATTTCGGGC : 541
MhyYABBY2 : TCCCGACATAAGTCAAGGGAGGCGTTCACTGCCGCTGCAAAAGAATTGGGCC---ACTTCCCCACATTCATTTCGGGC : 541
MhyYABBY7 : TCCAGATATACCCATAGGGGAGCATTCACTGCTGCAAAAAATTGGGCC---ACTTCCCCATATTCATTTCGGGC : 469
MhyYABBY1 : TCCAGATATACCCATAGGGGAGCATTCACTGCTGCAAAAAATTGGGCC---ACTTCCCCATATTCATTTCGGGC : 472
MhyYABBY3 : TCCAGATATACCCATAGGGGAGCATTCACTGCTGCTGCAAAAAATTGGGCC---ACTTCCCCATATTCATTTCGGGC : 521
MhyYABBY4 : TCCAGATATACCCATAGGGGAGCATTCACTGCTGCTGCAAAAAATTGGGCC---ACTTCCCCATATTCATTTCGGGC : 521
T C C           A T a C A a g G A G C T T c a g G c G c T G c a A A A T G G G C c           A t T C C c           a t t C a t

MhyYABBY5 : TCTTGCCTGAT-CAACCCCTGAAG--AAAGCTAATGTGCGCCA--GCAGGAAGGAGATGATGTGATGATGAAAGATGGGT : 622
MhyYABBY6 : TCTTGCCTGAT-CAACCCCTGAAG--AAAGCTAATGTGCGCCA--GCAGGAAGGAGATGATGTGATGATGAAAGATGGGT : 616
MhyYABBY2 : TCTTGCCTGAT-CAACCCCTGAAG--AAAGCTAATGTGCGCCA--GCAGGAAGGAGATGATGTGATGATGAAAGATGGGT : 616
MhyYABBY7 : TAATGCTGAGAGACCAACCCAAACTAACTTTGAGGTCTACTGCACAATGAAAT----TGTGGTCTTCAAGTTGAA : 545
MhyYABBY1 : CAATGCTCAGGAGCAGTAACCATGACTGA----- : 501
MhyYABBY3 : -AAAGGGAGAGTTAGCTGTGGTGGAGGAGCAGATCATGCAAAG-ATGTCAACGAACTGTTCAGATGCTGGAGGAGAGGT : 599
MhyYABBY4 : -AAAGGGAGAGTTAGCTGTGGTGGAGGAGCAGATCATGCAAAG-ATGTCAACGAACTGTTCAGATGCTGGAGGAGAGGT : 599
G g a A c           A a t           a           a a g a t           g t g t           g

MhyYABBY5 : TTCTTGCTCCTGCCAATGTGGGTGTGTCCCCCTACTAA----- : 660
MhyYABBY6 : TTCTTGCTCCTGCCAATGTGGGTGTGTCCCCCTACTAA----- : 654
MhyYABBY2 : TTCTTGCTCCTGCCAATGTGGGTGTGTCCCCCTACTAA----- : 654
MhyYABBY7 : ATCTCCATTGTGGAAATGA----- : 564
MhyYABBY1 : ----- : -
MhyYABBY3 : TTATGTACAAGGCAATGGATTCCATGAAAAGGCTCACGCATTTTTATCAGGA--CAAGGACACCCGTTGA- : 669
MhyYABBY4 : AATCTTGACTCGGTATAGTGGAAACGAAAATAAATGTGACAAGTTGGTTCCTGTTCAATTCCAATCCGGACT : 672
g a g
```

**b**

```

                *           20           *           40           *           60           *           80
MhyYABBY5 : MSSSNSFSPEHQTHPHQHLSPSSSDQLCYAHCEFCNTVLVVSVPCCSLLFKTATVRCGHCTSLFSVNI RGLLLPQPQLHH : 80
MhyYABBY6 : MSSSNSYSYSPDHQTHSHLPHS--SSDQLCYVQCNICD TVLAVSVPCSSLFKATVRCGHCTSLFSVNI RGLLLPQPQLHH : 78
MhyYABBY2 : MSSSNSYSYSPDHQTHSHLPHS--SSDQLCYVQCNICD TVLAVSVPCSSLFKAVTVRCGHCTSLLSVTMPGLLLPQPQLHH : 78
MhyYABBY7 : -----MSSCADVPRE-----QLCYIPCNFCNIVLAVSVPCSSLFDTVTVRCGHCTNLWSVNMMAAFQS----LQS : 61
MhyYABBY1 : -----MGDKASMDLVPPA----DNLCYVRCNFCNTVLAVGIPCKRLLD TVTVKCGHCSNLSFLSTRPPTQGQ--CFDHQ : 68
MhyYABBY3 : -----MSNTTPNRVLDLQ----EQICYVQCGYCTTILLVGVPCGSLTMVVTVRCGHCTSLLSVNM LKTSFIP---LHL : 66
MhyYABBY4 : -----MSNTTPNRVLDLQ----EQICYVQCGYCTTILLVGVPCGSLTMVVTVRCGHCTSLLSVNM LKTSFIP---LHL : 66
                q6CY C C t6L V 6PC sL TV4CGHC3 L s6 lh

                *           100          *           120          *           140          *           160
MhyYABBY5 : LGNSLFS--PQNLEEIRSSSTPNLLINQPHQSEFFTAVRGFDDL----PKPPAANRPPEKRQRVPSAYNRFIKDEIQRIK : 154
MhyYABBY6 : LGNSLFS--PQNLEEIRSSSTPNLLINQPHQSEFFTAVRGFDDL----PKPPAANRPPEKRQRVPSAYNRFIKDEIQRIK : 152
MhyYABBY2 : LGHSFIS--PQNLLDEIRSSSPNLLINQPHPNESFSAVRGFDEL----PKPAANRPPEKRQRVPSAYNRFIKDEIQRIK : 152
MhyYABBY7 : FQAPNYG--PPDCSIDFGSSSK--CTNNMTTRPPIIAN---NNE----GR--AANRPPEKRQRVPSAYNQFIKEEQRIK : 128
MhyYABBY1 : TSFQFG--PFGSEMKNKGQSSSSSSSEPLSPRAPFVVK-----PPPEKHHRLPSAYNRFMKEEIQRIK : 128
MhyYABBY3 : FASVSQDQM PKQVPSSCEEADGEHEKASDRRSPSLVISSDDDEEDVLVPMNHIVNRPEKRQRAPSAYNRFIKEEQIRLK : 146
MhyYABBY4 : FASVSQDQM PKQVPSSCEEADGEHEKASDRRSPSLVISSDDDEEDVLVPMNHIVNRPEKRQRAPSAYNRFIKEEQIRLK : 146
                P nrPPEK4qR PSAYN F6K EI R6K

                *           180          *           200          *           220          *
MhyYABBY5 : AGNPDISHREAFSAAAKNWA-HFPHIH-----FGLLPDQPLKKANVRQQEGDDVMMKDGFLGAPANVGVSPY----- : 219
MhyYABBY6 : AGNPDISHREAFSAAAKNWA-HFPHIH-----FGLLPDQPMKKANVRQQEGDDVMMKDGFLGAPANVGVSPY----- : 217
MhyYABBY2 : AGNPDISHREAFSAAAKNWA-HFPHIH-----FGLLPDQPMKKANVRQQEGDDVMMKDGFLGAPANVGVSPY----- : 217
MhyYABBY7 : ANNPDISHREAFSTAANKNWA-HFPHIH-----FGLMLET-----TN-QTKLDEVYCTNEIVGLQLK--SPLWN---- : 187
MhyYABBY1 : AANPEIPHREAFSAAAKNWAYI P NSP-----AGSMSRS-----SNHD----- : 166
MhyYABBY3 : GKHP SMTHKEAFSAAAKNWA-HFPPIQYKKGEVSCGEGADHAKMSTNCS DAGGEVYVQNGFHERKAHAFYQDKDTR-- : 222
MhyYABBY4 : GKHP SMTHKEAFSAAAKNWA-HFPPIQYKKGEVSCGEGADHAKMSTNCS DAGGEVILTRYSGNEIKCDLVPVSIPIRT : 224
                P 6 H4EAFSaaAKNWA hfP i G
```

**Figure 2**

*a*

FIL-H(11): NQP[NHS][PQA][NS][ED][SPF][LVF][MTL][PA]

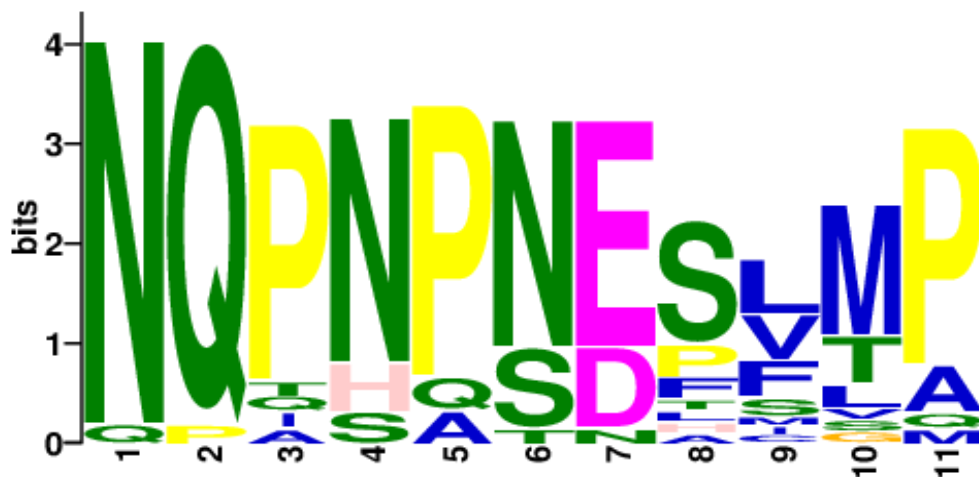

*b*

FIL-I(12): [GTV][VLFE][DE][ED][LI]P[KRQ]PP[VAP][AV]N

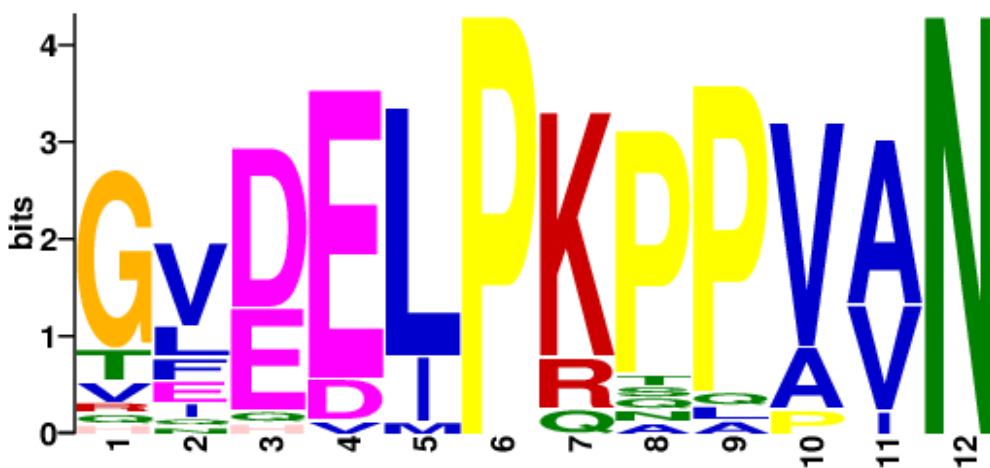

*c*

YAB5-Cm(12):[IPTA][ATP][NSA][NH][VTIAN][THSN]EER[VIA][VA]N

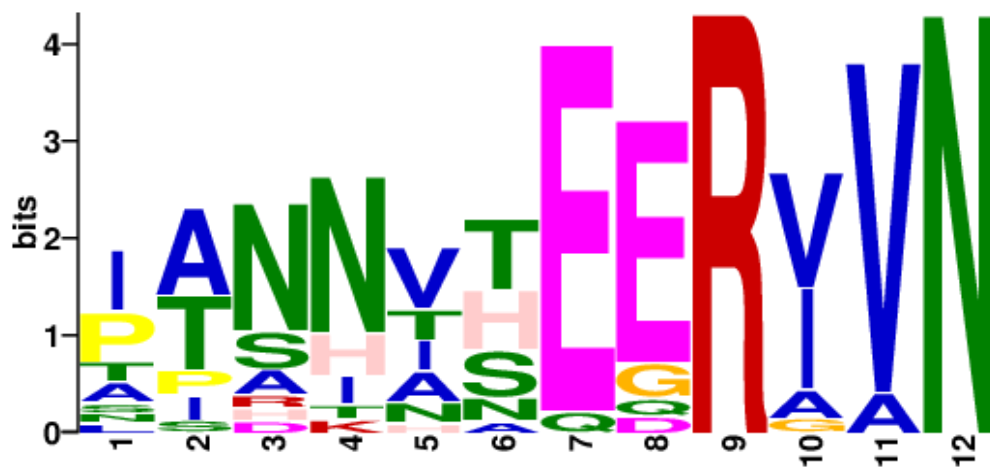

*d*

CRC-E(15):IP[NH][SPT]P[ATN][GS]S[VL][SA][GEA][STN][SK][NSV][NHS]

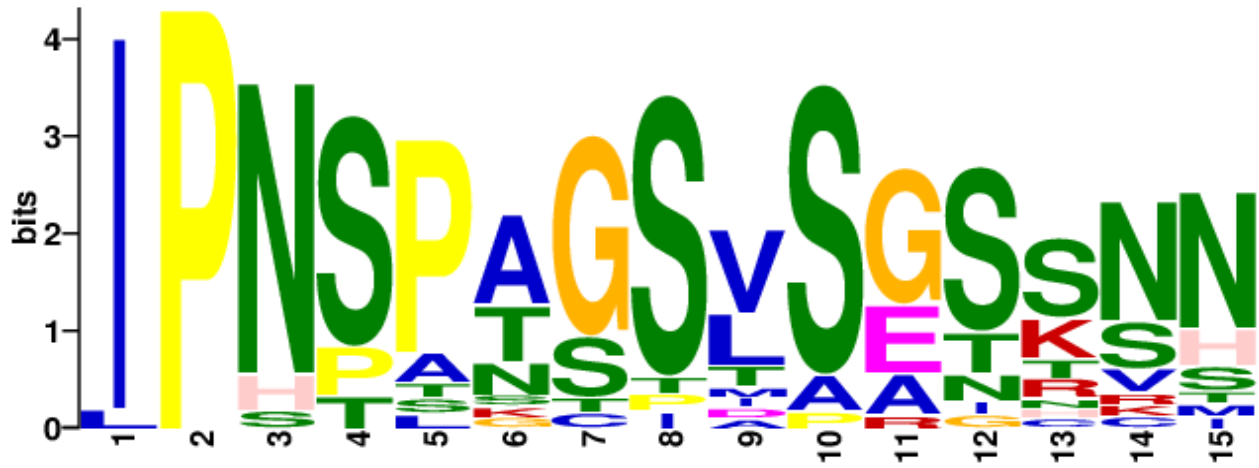

*e*

INO-B(11):[MN][ST][TAS]L[ND][HSR][LFY][FL][DE][LF][PQS]

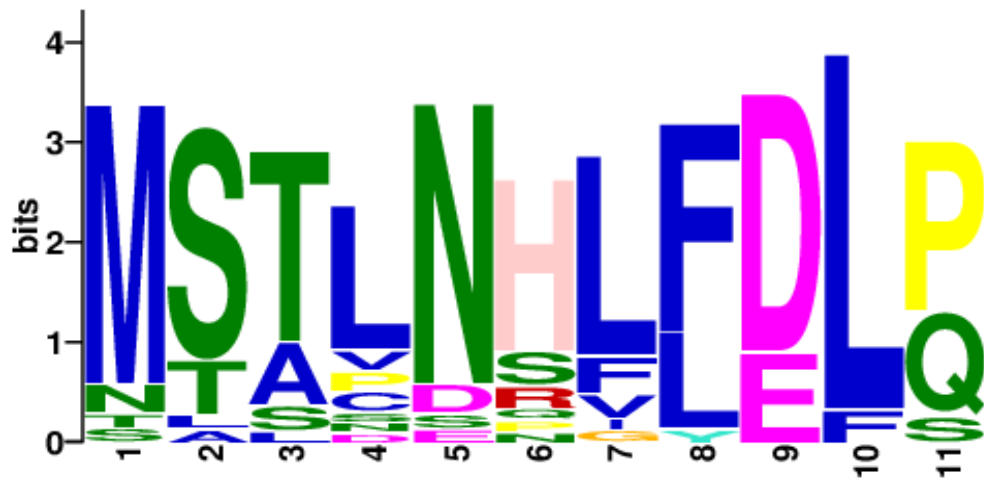

*f*

INO-C(15):RS[PS][STP][LMP][VM][IATFV][SY][SN][DS][NED][EDN][EDL][ED][DEY]

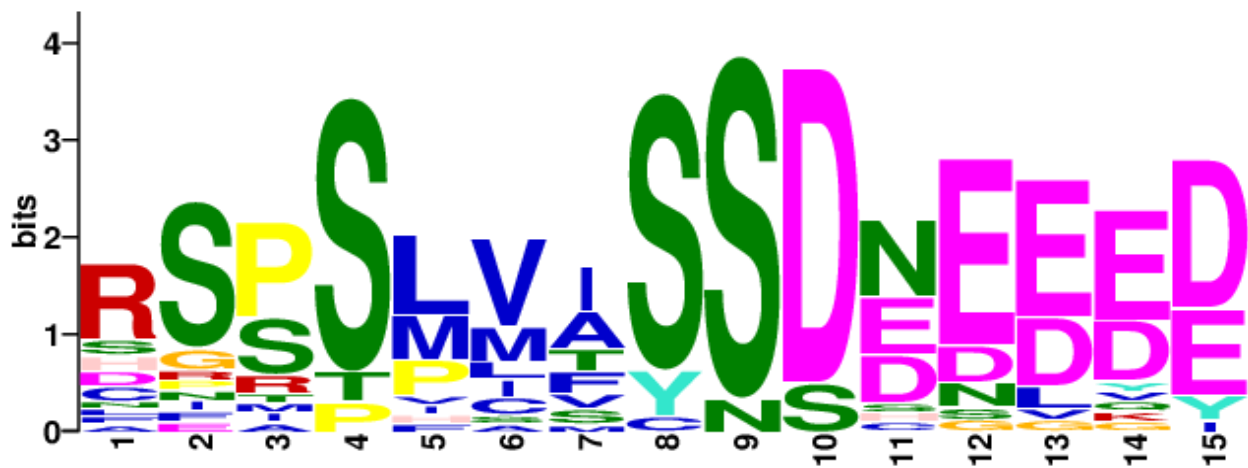

g

INO-D(26):[PG]EV[SD][KC][GD]E[GTI][DA]D[HA][NA]K[MK][SN][TS]N[SC][SD][ED][EA][GD][QG][LE][VE][NYI]

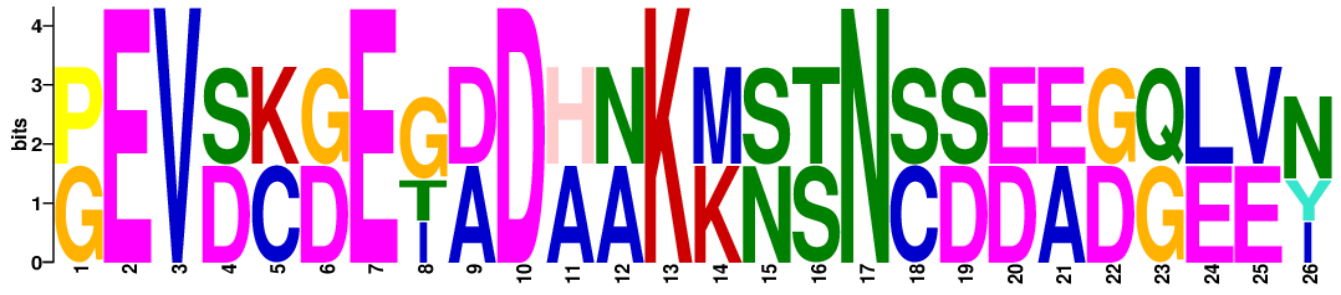

Supplement: f2 [file 7203469.f2.pdf]
