# Supplementary material for: The YABBY Genes of Leaf and Leaf-Like Organ Polarity in Leafless Plant Monotropa hypopitys
Source: Int J Genomics. 2018 Apr 24;2018:7203469. doi: 10.1155/2018/7203469 (PMC5941816; doi:10.1155/2018/7203469)
Supplement: Supplementary 1 — Tables 1–7: primers used for qRT-PCR analysis of pinesap gene expression (1); assembled transcripts homologous to the known organ polarity genes in six pinesap transcriptomes (2); MhyYABBY characteristics (3); estimates of evolutionary divergence between nucleotide sequences of the MhyYABBY genes (4); estimates of evolutionary divergence between amino acid sequences of the MhyYABBY proteins (5); set of YABBY orthologues from different plant species used for MEME-mediated identification of clade-specific conserved motifs (6); the significance (p-value) of qRT-PCR results for one gene expression between pinesap tissues (7) (in Microsoft Excel worksheet file (.xls)). [file 7203469.f1.xls]

## Sheet: Supplementary Material 1
The YABBY genes of leaf and leaf-like organ polarity in leafless plant Monotropa hypopitys
Anna V. Shchennikova¹,*, Marya A. Slugina¹,², Alexey V. Beletsky¹, Mikhail A. Filyushin¹, Andrey V. Mardanov¹, Olga A. Shulga¹, Elena Z. Kochieva¹,², Nikolay V. Ravin¹, Konstantin G. Skryabin¹,²
¹Federal State Institution "Federal Research Centre “Fundamentals of Biotechnology” of the Russian Academy of Sciences", Moscow 119071, Russia
²Lomonosov Moscow State University, Moscow 119991, Russia
*Corresponding author: email: shchennikova@yandex.ru
Supplementary Tables 1–7: Primers used for qRT-PCR analysis of pinesap genes expression (1); Assembled transcripts homologous to the known organ polarity genes in six pinesap transcriptomes (2); MhyYABBYs characteristics (3); Estimates of evolutionary divergence between nucleotide sequences of the MhyYABBY genes (4); Estimates of evolutionary divergence between amino acid sequences of the MhyYABB…

## Sheet: Table 1
Table 1. Primers used for qRT-PCR analysis of pinesap gene expression
M. hypopitys genes		Primer pair	Annealing temperature
Reference genes	MhyActin3	MhAct3F: CGTCGTCATCGACAATGGCAC	62 0C
		MhAct3R: AGATCAGCCATAACACCGGCTC
	MhyActin5	MhAct5F: TCATCGACAATGGTGCCTCCTA	60 0C
		MhAct5R: AGGTCCTGACCTTGTGCAATCA
	MhySAND	MhSF: GGCAGGCAAACACCAGGTAG	61,5 0C
		MhSR: GTTCCTCCAAGCAAGGGTGTC
Analyzed genes	MhyCRC	MhCRCF: CTTGCGGTTGGGATACCATGC	62 0C
		MhCRCR: GAGAGTGGCTCGCTTGAAGATG
	MhyINO1	MhINO1F: GACTCACAAGGAAGCCTTCAGT	60 0C
		MhINO1R: GTCCTGATAAAATGCGTGAGCC
	MhyINO2	MhINO1F: GACTCACAAGGAAGCCTTCAGT	60 0C
		MhINO2R: GTCCGGATTGGAATTGAAACAGG
	MhyYABBY5	MhYB5F: GAAGAGATACAGAGGATCAAGGC	60 0C
		MhYB5R: TGGAGATTTCAACTGAAGACCAAC
	MhyFIL3	MhFIL3F: TCCATCATCTTGGCCACTCATTC	61 0C
		MhFIL3R: CTCGCACAGCTGAGAATGATTCAT

## Sheet: Table 2
Table 2. Assembled transcripts homologous to the known organ polarity genes in six pinesap transcriptomes.
*Reads of the same product type are summarized, and these sum values are highligted in blue and used for Heatmap generation.
Transcript (https://www.ncbi.nlm.nih.gov/sra/SRP069226) (Beletsky et al. 2017)	BRACT1	BRACT2	FLOWER1	FLOWER2	ROOT1	ROOT2	product
TRINITY_DN906_c0_g1_i1	0	0.163	0.583	1.005	0.647	0.365	homeobox-leucine zipper protein REVOLUTA
TRINITY_DN10434_c0_g1_i1	0.024	0	0.681	0.313	0.069	0.587	homeobox-leucine zipper protein REVOLUTA
TRINITY_DN10434_c0_g2_i1	0.024	0.469	0	1.246	0.069	0	homeobox-leucine zipper protein REVOLUTA
TRINITY_DN14523_c0_g1_i1	0.18	0.235	0.341	0.692	0.66	2.022	homeobox-leucine zipper protein REVOLUTA
TRINITY_DN178_c0_g1_i1	0.192	0	1.189	1.547	1.321	0.926	homeobox-leucine zipper protein REVOLUTA-like isoform X1
TRINITY_DN20125_c0_g4_i3	0.456	0.459	0.348	1.108	1.252	2.296	homeobox-leucine zipper protein REVOLUTA
TRINITY_DN20125_c1_g1_i1	0.264	0.347	0.507	1.047	0.385	0.391	homeobox-leucine zipper protein REVOLUTA
	1.14	1.673	3.649	6.958	4.403	6.587	REVOLUTA
TRINITY_DN42085_c0_g1_i1	0	0.275	0.265	0.289	0.495	0.522	homeobox-leucine zipper protein ATHB-4
TRINITY_DN25262_c1_g1_i1	1.283	2.223	2.029	2.667	1.403	1.565	homeobox protein HAT3.1 isoform X2
TRINITY_DN24994_c0_g2_i1	0	0.173	0.106	0.506	0.22	0.222	homeobox-leucine zipper protein ATHB-15 (INCURVATA/CORONA)
TRINITY_DN24994_c0_g3_i1	0.168	0.673	1.128	1.348	1.252	3.131	homeobox-leucine zipper protein ATHB-15 (INCURVATA/CORONA)
TRINITY_DN24994_c0_g2_i3	0	0.153	0.333	0.801	0.66	0.809	homeobox-leucine zipper protein ATHB-15 (INCURVATA/CORONA)
TRINITY_DN24994_c0_g2_i4	0.036	0.163	0.235	0.163	0.248	1.278	homeobox-leucine zipper protein ATHB-15 (INCURVATA/CORONA)
TRINITY_DN24994_c0_g2_i6	0.192	0	0.204	0	0	0.157	homeobox-leucine zipper protein ATHB-15 (INCURVATA/CORONA)
TRINITY_DN24994_c0_g2_i7	0	0	0.008	0	0	0.483	homeobox-leucine zipper protein ATHB-15 (INCURVATA/CORONA)
TRINITY_DN24994_c0_g2_i8	0.06	0.01	0.098	0.09	0.193	0.978	homeobox-leucine zipper protein ATHB-15 (INCURVATA/CORONA)
	0.456	1.172	2.112	2.908	2.573	7.058	INCURVATA/CORONA
TRINITY_DN8963_c0_g1_i1	1.127	0.489	1.545	1.282	0.66	0.183	transcription repressor KAN1
TRINITY_DN23692_c1_g1_i1	0.276	0.744	0.75	1.336	0	0.052	transcription repressor KAN1
TRINITY_DN23692_c1_g1_i2	0.42	0.744	0.712	1.397	0.867	0.483	transcription repressor KAN1
TRINITY_DN23692_c1_g1_i3	0.156	0	0	0.205	0	0	transcription repressor KAN1
	1.979	1.977	3.007	4.22	1.527	0.718	KAN1
TRINITY_DN17656_c0_g2_i3	0.144	0.102	0	0	0.894	1.239	probable transcription factor KAN4
TRINITY_DN17656_c0_g2_i4	0	0	0.061	0.199	0.371	0.874	probable transcription factor KAN4
	0.144	0.102	0.061	0.199	1.265	2.113	KAN4
TRINITY_DN12014_c0_g1_i1	0.24	0.632	0.545	0.981	0.647	0.757	probable transcription factor KAN2
TRINITY_DN17656_c0_g2_i1	0	0	0.333	0.409	0.069	0.261	probable transcription factor KAN2
TRINITY_DN17656_c0_g2_i2	0.528	0.52	0	0	0.729	0.496	probable transcription factor KAN2
	0.768	1.152	0.878	1.39	1.445	1.514	KAN2
TRINITY_DN9462_c0_g1_i1	0.3	0	0.825	0.975	0.289	0.535	zinc finger protein ZPR1-like
TRINITY_DN9462_c0_g1_i2	0.216	0.591	0.515	0.704	0	0.339	zinc finger protein ZPR1-like
	0.516	0.591	1.34	1.679	0.289	0.874	ZPR1
TRINITY_DN29238_c0_g1_i1	0.935	1.784	4.127	3.75	1.045	1.018	auxin-responsive protein SAUR72-like
TRINITY_DN17637_c0_g1_i1	0	0.204	0	1.15	0.371	2.374	auxin-responsive protein SAUR72-like
	0.935	1.988	4.127	4.9	1.416	3.392	SAUR72
TRINITY_DN26951_c0_g1_i1	2.614	3.304	0.129	0	0.234	0.196	auxin-responsive protein SAUR71-like
TRINITY_DN24615_c0_g3_i3	0	0.082	0	0	0	0.078	auxin-responsive protein SAUR24-like
TRINITY_DN24615_c0_g3_i4	0.12	0.826	0.5	3.726	0	0	auxin-responsive protein SAUR24-like
	0.12	0.908	0.5	3.726	0	0.078	SAUR24
TRINITY_DN15549_c0_g1_i1	2.134	11.747	0.924	1.023	13.164	20.611	auxin-responsive protein SAUR36-like
TRINITY_DN20299_c0_g1_i1	5.42	5.363	0.984	1.842	1.045	1.291	SAUR family protein
TRINITY_DN17637_c0_g2_i1	0.108	0	4.407	3.997	0.069	0.678	SAUR family protein
TRINITY_DN8758_c0_g1_i1	0.3	0.326	2.37	1.944	0.083	0.143	SAUR family protein
TRINITY_DN6858_c0_g1_i1	0	0.479	4.52	8.241	0	0	SAUR family protein
	5.828	6.168	12.281	16.024	1.197	2.112	SAUR
TRINITY_DN22136_c0_g1_i1	4.125	7.005	6.307	8.416	1.334	3.809	auxin-responsive protein IAA1-like
TRINITY_DN22136_c0_g1_i2	0.468	8.759	1.31	9.361	0.399	3.026	auxin-responsive protein IAA1-like
	4.593	15.764	7.617	17.777	1.733	6.835	IAA1
TRINITY_DN18482_c0_g1_i1	0	0	0	0	1.169	1.774	IAA-amino acid hydrolase ILR1-like 4
TRINITY_DN18482_c0_g1_i2	0.336	0.408	0.114	0.355	4.443	9.836	IAA-amino acid hydrolase ILR1-like 4
	0.336	0.408	0.114	0.355	5.612	11.61	ILR1-4
TRINITY_DN24261_c0_g1_i10	0.048	0.897	0.78	1.132	0.261	1.057	auxin-responsive protein IAA11 isoform X1
TRINITY_DN24261_c0_g1_i17	0.24	0.204	0.598	1.186	0.66	1.879	auxin-responsive protein IAA11 isoform X1
TRINITY_DN24261_c0_g1_i21	0.564	0.816	0.553	1.734	0.66	0.626	auxin-responsive protein IAA11 isoform X1
	0.852	1.917	1.931	4.052	1.581	3.562	IAA11
TRINITY_DN24261_c0_g1_i2	0.827	1.275	0.25	0.409	0.358	1.083	IAA12
TRINITY_DN17304_c0_g1_i1	0	2.08	3.748	3.606	0	0	auxin-responsive protein IAA14-like isoform X1
TRINITY_DN17304_c0_g1_i2	3.321	5.557	5.603	7.573	2.228	5.975	auxin-responsive protein IAA14-like isoform X1
	3.321	7.637	9.351	11.179	2.228	5.975	IAA14
TRINITY_DN18319_c0_g1_i1	0.659	0.265	1.09	1.938	0.536	0.404	auxin-responsive protein IAA16
TRINITY_DN12645_c0_g1_i1	0.528	0.877	0.265	0.373	0.179	0.313	auxin response factor 18
TRINITY_DN24127_c0_g1_i1	0.276	0.826	1.227	4.617	1.94	1.957	auxin-responsive protein IAA18-like isoform X1
TRINITY_DN24127_c0_g1_i2	0.612	0.489	0.689	1.836	3.92	3.627	auxin-responsive protein IAA18-like isoform X1
	1.416	2.192	2.181	6.826	6.039	5.897	IAA18
TRINITY_DN2118_c0_g2_i1	0.192	0.51	0	1.427	0	0	auxin-responsive protein IAA26-like isoform X2
TRINITY_DN18900_c0_g1_i1	0.6	0.52	0.765	1.938	1.266	2.139	auxin-responsive protein IAA26-like isoform X2
TRINITY_DN18900_c0_g2_i1	0.12	0	0.303	1.403	1.554	4.983	auxin-responsive protein IAA26-like
TRINITY_DN2118_c0_g3_i1	0	0	0.681	0.476	1.045	1.409	auxin-responsive protein IAA26-like
TRINITY_DN31666_c0_g1_i1	0.18	0.153	0	0.855	0.413	2.113	auxin-responsive protein IAA26-like
	1.092	1.183	1.749	6.099	4.278	10.644	IAA26
TRINITY_DN24284_c2_g1_i1	1.883	0.734	2.143	2.161	0.041	1.148	auxin-responsive protein IAA27
TRINITY_DN24284_c2_g1_i2	0.791	2.437	0.916	3.407	0	0.783	auxin-responsive protein IAA27
TRINITY_DN25343_c4_g2_i1	0.516	1.254	2.097	4.009	1.94	2.348	auxin-responsive protein IAA27-like
	3.19	4.425	5.156	9.577	1.981	4.279	IAA27
TRINITY_DN16330_c0_g1_i1	0.144	0.54	0.492	0.957	0.784	1.852	Transcriptional factor B3 family protein / auxin-responsive factor AUX/IAA-related
TRINITY_DN24432_c0_g2_i1	0.276	0.693	0	0	0.468	0.652	Transcriptional factor B3 family protein / auxin-responsive factor AUX/IAA-related
TRINITY_DN24432_c0_g2_i2	0	0	0.189	0.734	0.674	2.231	Transcriptional factor B3 family protein / auxin-responsive factor AUX/IAA-related
TRINITY_DN24432_c0_g2_i3	0	0	0.114	0.036	0	0.522	Transcriptional factor B3 family protein / auxin-responsive factor AUX/IAA-related
TRINITY_DN24432_c0_g2_i4	0.144	0.336	0.023	0	0	0	Transcriptional factor B3 family protein / auxin-responsive factor AUX/IAA-related
TRINITY_DN24432_c0_g2_i15	0.192	0.143	0	0.084	0.138	0.274	Transcriptional factor B3 family protein / auxin-responsive factor AUX/IAA-related
TRINITY_DN24432_c0_g2_i16	0.084	0.551	0.053	0.656	1.307	1.618	Transcriptional factor B3 family protein / auxin-responsive factor AUX/IAA-related
TRINITY_DN31152_c0_g1_i1	0.288	0.459	0.076	0.921	0.908	1.044	Transcriptional factor B3 family protein / auxin-responsive factor AUX/IAA-related
	1.128	2.722	0.947	3.388	4.279	8.193	AUX/IAA-related
TRINITY_DN24617_c0_g1_i1	24.377	30.702	26.41	28.756	13.384	26.925	Aux/IAA protein
TRINITY_DN24617_c0_g1_i2	27.638	42.734	66.305	78.479	21.143	38.875	Aux/IAA protein
TRINITY_DN23100_c0_g1_i1	2.554	1.234	8.412	2.733	1.197	1.383	Aux/IAA protein
TRINITY_DN25855_c0_g1_i1	0	0	0.25	0.668	0.344	0.483	Aux/IAA protein
	54.569	74.67	101.377	110.636	36.068	67.666	Aux/IAA
TRINITY_DN13461_c0_g2_i1	0.324	0.785	0.174	1.433	0	0.313	ARF guanine-nucleotide exchange factor GNOM
TRINITY_DN13461_c0_g2_i2	1.595	1.631	1.522	1.126	1.155	1.252	ARF guanine-nucleotide exchange factor GNOM
TRINITY_DN25035_c1_g2_i1	0	0.326	0.651	0.066	0	0	ARF guanine-nucleotide exchange factor GNOM
TRINITY_DN25473_c0_g1_i1	0.576	1.101	1.068	1.132	0.33	0.926	ARF guanine-nucleotide exchange factor GNOM
TRINITY_DN25473_c0_g1_i2	0.504	0.571	0.56	0.415	0.11	1.383	ARF guanine-nucleotide exchange factor GNOM
TRINITY_DN25473_c0_g1_i3	1.523	2.152	1.03	1.746	1.004	0.952	ARF guanine-nucleotide exchange factor GNOM
TRINITY_DN25473_c0_g1_i4	0.252	1.091	1.189	1.445	0.702	0.848	ARF guanine-nucleotide exchange factor GNOM
TRINITY_DN25473_c0_g1_i5	1.067	1.377	1.673	1.908	1.087	1.213	ARF guanine-nucleotide exchange factor GNOM
TRINITY_DN25473_c0_g1_i6	0.312	0.938	0.727	0.843	0.454	0.652	ARF guanine-nucleotide exchange factor GNOM
TRINITY_DN25473_c0_g2_i1	0.552	0.958	2.006	2.167	1.774	1.761	ARF guanine-nucleotide exchange factor GNOM
	6.705	10.93	10.6	12.281	6.616	9.3	GNOM
TRINITY_DN52971_c0_g1_i1	0.084	0	0.159	0.951	0.193	0.326	auxin-responsive GH3 family protein
TRINITY_DN23262_c0_g1_i1	1.355	2.498	0	1.065	0.633	0.613	protein kinase PINOID
TRINITY_DN23262_c0_g1_i2	0.12	0	0.651	0	0	0.183	protein kinase PINOID
TRINITY_DN23262_c0_g1_i3	0.312	0.602	1.015	2.835	0.138	0.457	protein kinase PINOID-like
TRINITY_DN23262_c0_g1_i4	0	0	0.734	0.632	0.564	0.157	protein kinase PINOID-like
	1.787	3.1	2.4	4.532	1.335	1.41	PINOID
TRINITY_DN24857_c1_g1_i1	0.18	0.387	1.007	1.962	0	0.47	PIN1-like family protein
TRINITY_DN24857_c1_g1_i2	0.3	1.315	3.369	4.328	0.248	0.3	PIN1-like family protein
TRINITY_DN24857_c1_g1_i3	0.336	1.815	3.089	4.834	0.688	0.613	PIN1-like family protein
TRINITY_DN24857_c1_g1_i4	0	0.184	1.726	1.746	0	0	PIN1-like family protein
TRINITY_DN24857_c1_g1_i5	0.204	0.642	2.446	0.746	0.22	0.457	PIN1-like family protein
TRINITY_DN24857_c1_g1_i8	0.12	1.275	1.726	3.943	0.083	0.457	PIN1-like family protein
TRINITY_DN24857_c1_g1_i9	0.276	0.846	0.946	0.939	0.261	0.535	PIN1-like family protein
	1.416	6.464	14.309	18.498	1.5	2.832	PIN1
TRINITY_DN2687_c0_g1_i1	0.432	0.999	0.454	1.186	0.165	0.143	BTB/POZ domain-containing protein NPY1
TRINITY_DN16440_c0_g1_i1	0.695	0.765	0.56	1.126	0.303	0.339	BTB/POZ domain-containing protein NPY1
TRINITY_DN20958_c0_g1_i1	0.432	0.806	0.182	0.68	0.495	0.561	BTB/POZ domain-containing protein NPY1
TRINITY_DN20958_c1_g1_i1	0.36	0.51	0.447	0.807	0.481	0.548	BTB/POZ domain-containing protein NPY1
TRINITY_DN20958_c1_g1_i2	0	0.347	0.144	0.56	0.289	0.339	BTB/POZ domain-containing protein NPY1
TRINITY_DN20958_c1_g1_i3	0.54	0	0.613	0.283	0	0	BTB/POZ domain-containing protein NPY1
	2.459	3.427	2.4	4.642	1.733	1.93	NPY1
TRINITY_DN19865_c0_g1_i1	0.108	0.224	0.787	1.421	0.44	0.352	BTB/POZ domain-containing protein NPY4
TRINITY_DN19865_c0_g1_i2	0	0.398	0.326	0.849	0	0.404	BTB/POZ domain-containing protein NPY4
	0.108	0.622	1.113	2.27	0.44	0.756	NPY4
TRINITY_DN25193_c2_g1_i1	0	0.112	0.151	0.445	0	0	auxin response factor 4
TRINITY_DN25193_c2_g1_i2	0.144	0.275	0.522	0.831	0.261	0.665	auxin response factor 4
TRINITY_DN25193_c2_g1_i3	0.24	0.408	0	0	0.977	0.639	auxin response factor 4
TRINITY_DN25193_c2_g1_i4	0.108	0.214	0.386	0.566	0.206	0.483	auxin response factor 4
TRINITY_DN25193_c2_g1_i5	0.348	0.275	0.22	0.397	0.303	0.496	auxin response factor 4
TRINITY_DN25193_c2_g1_i5	0.348	0.275	0.22	0.397	0.303	0.496	auxin response factor 4
TRINITY_DN25193_c2_g1_i6	0.743	0.326	0.167	0.903	0	0.665	auxin response factor 4
	1.931	1.885	1.666	3.539	2.05	3.444	ARF4
TRINITY_DN13112_c0_g1_i1	0.588	0.673	1.121	1.529	0.289	0.652	transcription factor SPATULA
TRINITY_DN5172_c0_g1_i1	0.42	0.602	1.257	1.637	0.591	0.587	protein ULTRAPETALA 1
TRINITY_DN3793_c0_g1_i1	0	0	0.151	0.5	0.124	0	AP2-like ethylene-responsive transcription factor ANT
TRINITY_DN3793_c0_g2_i1	0	0.051	0.257	0.439	0.124	0.365	AP2-like ethylene-responsive transcription factor ANT
TRINITY_DN19183_c0_g3_i1	0.54	2.437	0.288	0.993	0.536	0.274	AP2-like ethylene-responsive transcription factor ANT
TRINITY_DN37832_c0_g1_i1	0	0	0.606	0.265	0	0.196	AP2-like ethylene-responsive transcription factor ANT
TRINITY_DN19183_c0_g1_i1	0.084	0	0.121	0.885	0.096	0.209	AP2-like ethylene-responsive transcription factor ANT
TRINITY_DN19183_c0_g2_i1	0.084	3.12	0.121	1.102	0.096	0.104	AP2-like ethylene-responsive transcription factor ANT
TRINITY_DN47991_c0_g1_i1	0	0	0.697	1.059	0	0.091	AP2-like ethylene-responsive transcription factor ANT
	0.708	5.608	2.241	5.243	0.976	1.239	ANT
TRINITY_DN25127_c2_g1_i1	0	0	0	0	0	0	transcriptional corepressor SEUSS
TRINITY_DN25127_c2_g1_i3	1.547	1.54	0.469	0.915	0.206	0.222	transcriptional corepressor SEUSS
TRINITY_DN25127_c2_g1_i4	1.103	0.938	0.538	0.524	0.426	0	transcriptional corepressor SEUSS
TRINITY_DN25127_c2_g1_i6	0	0.418	0.189	0.403	0	0.522	transcriptional corepressor SEUSS
TRINITY_DN25127_c2_g1_i7	0.743	0.999	0.303	0.457	0.083	0.209	transcriptional corepressor SEUSS
TRINITY_DN25127_c2_g1_i8	0	0.306	0.159	0.566	0.096	0	transcriptional corepressor SEUSS
TRINITY_DN25127_c2_g1_i9	0	0	0	0	0.193	0	transcriptional corepressor SEUSS
TRINITY_DN25127_c2_g1_i2	0.192	0.153	1.098	0.927	0.055	0.47	transcriptional corepressor SEUSS
TRINITY_DN34344_c0_g1_i1	0	0.632	0	0.223	0	0.235	transcriptional corepressor SEUSS
TRINITY_DN25127_c2_g1_i5	0.743	0.265	0.969	0.542	0.248	0.065	transcriptional corepressor SEUSS
TRINITY_DN24448_c2_g2_i3	0.899	0.632	0.386	0.698	0.426	0.417	transcriptional corepressor SEUSS
	5.227	5.883	4.111	5.255	1.733	2.14	SEU
TRINITY_DN23762_c0_g1_i1	1.211	1.57	1.052	2.739	0.949	0.874	Transcriptional corepressor LEUNIG
TRINITY_DN23762_c0_g1_i2	2.638	3.538	2.764	4.894	1.197	1.474	Transcriptional corepressor LEUNIG
TRINITY_DN23762_c0_g1_i3	1.727	1.519	3.18	2.245	1.995	3.209	Transcriptional corepressor LEUNIG
TRINITY_DN24304_c1_g1_i4	1.775	1.254	1.916	1.914	1.541	2.27	Transcriptional corepressor LEUNIG
TRINITY_DN24304_c1_g1_i7	0.767	0.612	1.333	1.023	0.22	0.339	Transcriptional corepressor LEUNIG
TRINITY_DN24304_c1_g1_i5	0.432	0.489	0.22	0.247	0.248	0.835	Transcriptional corepressor LEUNIG
TRINITY_DN24304_c1_g1_i8	0	0.245	0.083	0	0	0.183	Transcriptional corepressor LEUNIG
TRINITY_DN24304_c1_g1_i9	0.767	0.204	0	0.313	0.385	0	Transcriptional corepressor LEUNIG
	9.317	9.431	10.548	13.375	6.535	9.184	LUG
TRINITY_DN24084_c0_g1_i1	0.072	0.296	1.113	2.462	0.22	0.157	transcription factor AS1 (ASYMMETRIC LEAVES 1; PHANTASTICA; AtMYB91)
TRINITY_DN24084_c0_g1_i2	0	0.184	0	1.643	0.289	0	transcription factor AS1 (ASYMMETRIC LEAVES 1; PHANTASTICA; AtMYB91)
TRINITY_DN24084_c0_g1_i3	0.072	1.346	0.454	3.937	0.22	0.235	transcription factor AS1 (ASYMMETRIC LEAVES 1; PHANTASTICA; AtMYB91)
TRINITY_DN24084_c0_g1_i4	2.95	1.448	1.37	0	0	0	transcription factor AS1 (ASYMMETRIC LEAVES 1; PHANTASTICA; AtMYB91)
TRINITY_DN24084_c0_g1_i5	0	1.285	0	0.993	0.399	0.926	transcription factor AS1 (ASYMMETRIC LEAVES 1; PHANTASTICA; AtMYB91)
	3.094	4.559	2.937	9.035	1.128	1.318	AS1
TRINITY_DN6508_c0_g1_i1	0.072	0	0.734	0.644	0.165	0.43	homeobox protein knotted-1-like 1 (BREVIPEDICELLUS=BP)
TRINITY_DN21556_c1_g2_i1	3.705	15.387	0.863	0.879	0.165	5.596	homeobox protein knotted-1-like 1 (BREVIPEDICELLUS=BP)
TRINITY_DN18150_c0_g4_i2	0.036	0	0.265	0.259	0.578	0.496	homeobox protein knotted-1-like 1 (BREVIPEDICELLUS=BP)
TRINITY_DN18150_c0_g4_i3	0	0	0	0.199	0.069	0	homeobox protein knotted-1-like 1 (BREVIPEDICELLUS=BP)
TRINITY_DN18150_c0_g4_i4	0	0	0	0.09	0.165	0	homeobox protein knotted-1-like 1 (BREVIPEDICELLUS=BP)
TRINITY_DN19114_c0_g2_i1	3.333	4.17	1.726	2.167	0.743	1.357	homeobox protein knotted-1-like 1 (BREVIPEDICELLUS=BP)
	7.146	19.557	3.588	4.238	1.885	7.879	BP
TRINITY_DN19114_c0_g2_i3	0.12	0.214	0.401	0.542	1.1	2.257	homeobox protein knotted-1-like 2 (KNAT2)
TRINITY_DN8856_c0_g1_i1	0	0	0	0	4.842	0.574	homeobox protein knotted-1-like 3 (KNAT3)
TRINITY_DN33456_c0_g1_i1	0.624	0	1.06	0	0	0	homeobox protein knotted-1-like 3 (KNAT3)
TRINITY_DN24937_c0_g1_i1	3.957	6.506	1.492	1.216	0	0	homeobox protein knotted-1-like 13 (KNAT3)
TRINITY_DN24937_c0_g1_i2	0	0	0	0	0.674	0.47	homeobox protein knotted-1-like 13 (KNAT3)
TRINITY_DN24937_c0_g1_i3	0.408	6.251	0.666	1.908	0.151	0.378	homeobox protein knotted-1-like 13 (KNAT3)
TRINITY_DN24937_c0_g1_i4	0.36	1.224	0.326	0.62	0.55	0.326	homeobox protein knotted-1-like 13 (KNAT3)
TRINITY_DN24937_c0_g1_i5	0	4.945	0	1.288	0	0	homeobox protein knotted-1-like 13 (KNAT3)
TRINITY_DN24937_c0_g1_i6	0	2.488	0	0	0.179	0	homeobox protein knotted-1-like 13 (KNAT3)
TRINITY_DN24937_c0_g1_i7	4.089	0.122	1.242	0	0.138	0.248	homeobox protein knotted-1-like 13 (KNAT3)
TRINITY_DN24937_c0_g1_i8	1.487	2.162	0.257	0.59	0	0.143	homeobox protein knotted-1-like 13 (KNAT3)
TRINITY_DN24937_c0_g1_i9	3.321	0.031	0.621	0	0.509	0.222	homeobox protein knotted-1-like 13 (KNAT3)
TRINITY_DN24937_c0_g1_i10	3.609	5.231	0.734	1.421	0.729	0.691	homeobox protein knotted-1-like 13 (KNAT3)
TRINITY_DN24937_c0_g1_i11	3.201	0	1.158	0	0	0	homeobox protein knotted-1-like 13 (KNAT3)
TRINITY_DN24937_c0_g1_i12	1.415	0	1.143	0.15	0	0	homeobox protein knotted-1-like 13 (KNAT3)
	22.471	28.96	8.699	7.193	7.772	3.052	KNAT3
TRINITY_DN24441_c0_g1_i2	0.168	1.122	0.522	1.77	1.224	0.613	homeobox protein knotted-1-like 7 (KNAT7)
TRINITY_DN24441_c0_g1_i3	3.801	5.853	2.643	2.781	0.426	1.174	homeobox protein knotted-1-like 7 (KNAT7)
	3.969	6.975	3.165	4.551	1.65	1.787	KNAT7
TRINITY_DN24770_c3_g5_i2	0.432	0	0.038	0	0.371	0.352	homeobox protein knotted-1-like 6 (KNAT6)
TRINITY_DN40942_c0_g1_i1	0	0.071	0.348	0.542	0.743	1.396	homeobox protein knotted-1-like 6 (KNAT6)
TRINITY_DN24770_c3_g5_i3	0	0	0.22	0.301	0.935	1.722	homeobox protein knotted-1-like 6 (KNAT6)
	0.432	0.071	0.606	0.843	2.049	3.47	KNAT6
TRINITY_DN12584_c0_g1_i1	15.971	9.707	0	0	1.83	1.213	homeobox-leucine zipper protein ATHB-6
TRINITY_DN12584_c0_g2_i1	0	0	15.958	13.743	2.572	10.227	homeobox-leucine zipper protein ATHB-6
TRINITY_DN22103_c0_g1_i1	0	0	2.437	2.492	0.193	2.883	homeobox-leucine zipper protein ATHB-6
TRINITY_DN22103_c0_g1_i2	0	0	3.008	0.704	4.044	4.579	homeobox-leucine zipper protein ATHB-6
TRINITY_DN22103_c0_g1_i3	3.034	2.484	10.503	7.103	0	0	homeobox-leucine zipper protein ATHB-6
TRINITY_DN22103_c0_g1_i4	12.254	8.177	0	0	0	1.226	homeobox-leucine zipper protein ATHB-6
TRINITY_DN22103_c0_g1_i5	14.077	10.6	8.433	3.714	11.967	12.993	homeobox-leucine zipper protein ATHB-6
TRINITY_DN22103_c0_g1_i6	0	0	8.983	5.099	2.641	1.996	homeobox-leucine zipper protein ATHB-6
	45.336	30.968	49.322	32.855	23.247	35.117	ATHB-6
TRINITY_DN14573_c0_g1_i1	0	0.848	2.019	0.999	0.757	0	homeobox-leucine zipper protein ATHB-12-like isoform X1
TRINITY_DN14573_c0_g1_i2	2.662	0.734	0.795	1.553	0.591	1.122	homeobox-leucine zipper protein ATHB-12-like isoform X1
	2.662	1.582	2.814	2.552	1.348	1.122	ATHB-12
TRINITY_DN11839_c0_g2_i1	4.796	4.407	4.323	2.275	5.227	5.296	homeobox-leucine zipper protein ATHB-13
TRINITY_DN25043_c0_g1_i1	1.607	3.937	1.897	6.236	0.234	0.404	homeobox-leucine zipper protein ATHB-13-like
	6.403	8.344	6.22	8.511	5.461	5.7	ATHB-13
TRINITY_DN31152_c0_g1_i1	0.288	0.076	0.459	0.921	0.908	1.044	ARF3
TRINITY_DN16804_c0_g1_i1	0.492	0.31	0.632	0.584	1.774	2.048	homeobox-leucine zipper protein HAT4
TRINITY_DN24470_c1_g2_i1	0	0.886	0	0.253	1.527	0.026	homeobox-leucine zipper protein HAT4
TRINITY_DN24470_c1_g2_i2	0.216	2.998	0.153	4.888	1.953	2.948	homeobox-leucine zipper protein HAT4
TRINITY_DN24470_c1_g2_i5	0	0.363	0.5	2.029	0	2.231	homeobox-leucine zipper protein HAT4
	0.708	4.557	1.285	7.754	5.254	7.253	HAT4
TRINITY_DN26020_c0_g1_i1	3.178	3.082	3.477	2.661	0.193	1.239	homeobox-leucine zipper protein HAT22-like
TRINITY_DN8832_c0_g1_i1	0	0.242	0.326	1.174	0.11	0.287	zinc finger protein JACKDAW-like
TRINITY_DN25164_c2_g1_i1	3.369	1.893	4.068	2.251	2.187	2.857	zinc finger protein JACKDAW-like
TRINITY_DN25164_c2_g1_i2	0	0	0.612	0.187	0	0.274	zinc finger protein JACKDAW-like
TRINITY_DN25164_c2_g1_i3	2.698	1.423	4.517	2.594	2.6	1.252	zinc finger protein JACKDAW-like
TRINITY_DN25164_c2_g1_i4	0	0.515	1.713	0	0	0.496	zinc finger protein JACKDAW-like
TRINITY_DN25164_c2_g1_i6	0	0	0	0.048	0	2.648	zinc finger protein JACKDAW-like
TRINITY_DN25164_c2_g1_i7	1.559	0.833	1.682	1.776	0.784	1.839	zinc finger protein JACKDAW-like
TRINITY_DN28953_c0_g1_i1	0.288	0.424	0.082	0.59	0	0	zinc finger protein JACKDAW-like
	7.914	5.33	13	8.62	5.681	9.653	JACKDAW
TRINITY_DN12182_c0_g1_i1	0	0	1.03	0.289	0	0	transcriptional regulator SUPERMAN
TRINITY_DN12182_c0_g2_i1	2.602	0.356	0	0.06	0.591	0.561	transcriptional regulator SUPERMAN
TRINITY_DN18111_c0_g2_i1	0	0.371	0.51	0.482	0	0	transcriptional regulator SUPERMAN
TRINITY_DN52313_c0_g1_i1	0	0.356	0	2.029	0	0	transcriptional regulator SUPERMAN
	2.602	1.083	1.54	2.86	0.591	0.561	SUPERMAN
TRINITY_DN48093_c0_g1_i1	0.456	0.432	0.265	0.415	0.358	0.378	ASL4
TRINITY_DN17080_c0_g1_i1	0	0	0	0.072	4.718	5.062	LOB domain-containing protein 4-like/ASL6
TRINITY_DN26935_c0_g1_i1	0.12	0.303	0	0.163	0	0.47	LOB domain-containing protein 15/ASL11
TRINITY_DN5622_c0_g1_i1	0	0.659	0	1.385	0	0	LOB domain-containing protein 18/AS2-like 20
TRINITY_DN49436_c0_g1_i1	0	0.507	0.102	1.216	0.44	0.483	LOB domain-containing protein 18
	0	1.166	0.102	2.601	0.44	0.483	ASL20
TRINITY_DN19844_c0_g1_i1	0	0	0	0	0	0	LOB domain-containing protein 22
TRINITY_DN19844_c0_g1_i2	0	2.476	0	1.144	0	0.091	LOB domain-containing protein 22
TRINITY_DN19844_c0_g1_i3	0	0.886	0	0.969	0	0	LOB domain-containing protein 22
	0	3.362	0	2.113	0	0.091	ASL30
TRINITY_DN15274_c1_g1_i1	0.923	0.931	0	0	0	0	LOB domain-containing protein 24-like/ASL13
TRINITY_DN52370_c0_g1_i1	0.959	1.529	0.785	1.547	0.124	0.104	LOB domain-containing protein 25-like isoform X1/ASL3
TRINITY_DN7715_c0_g1_i1	0	0.909	0.041	2.787	0.124	0	LOB domain-containing protein 27-like
TRINITY_DN31425_c0_g1_i1	0	0.144	0	1.631	0	0	LOB domain-containing protein 27-like isoform X2
	0	1.053	0.041	4.418	0.124	0	ASL29
TRINITY_DN36945_c0_g1_i1	0	1.613	0.082	0.849	0	0	LOB domain-containing protein 29-like/ASL16
TRINITY_DN12761_c1_g1_i1	1.115	1.545	0.653	1.433	0	0.613	LOB domain-containing protein 36-like, partial
TRINITY_DN12761_c1_g2_i1	0	0	0.653	0.957	0.578	0	LOB domain-containing protein 36-like, partial
TRINITY_DN24569_c1_g1_i1	0.336	1.651	0.632	2.053	0.729	0.274	LOB domain-containing protein 36-like
	1.451	3.196	1.938	4.443	1.307	0.887	ASL1
TRINITY_DN11289_c0_g1_i1	0.504	0.697	0	0.62	0.468	0.835	LOB domain-containing protein 37-like
TRINITY_DN11289_c0_g3_i1	0	0	0.214	0	0.591	0.248	LOB domain-containing protein 37-like
TRINITY_DN13857_c0_g1_i1	2.458	1.529	0.836	0.187	1.211	0.704	LOB domain-containing protein 37-like
	2.962	2.226	1.05	0.807	2.27	1.787	ASL39
TRINITY_DN24732_c3_g4_i1	0.276	0.159	0.133	0	8.529	13.737	LOB domain-containing protein 41
TRINITY_DN24732_c3_g4_i7	0.084	0	0	0.102	2.586	2.152	LOB domain-containing protein 41
TRINITY_DN24732_c3_g4_i8	0.3	0.379	0	0.114	2.242	5.609	LOB domain-containing protein 41
	0.66	0.538	0.133	0.216	13.357	21.498	ASL38
MhyYABBY1	0	0	3.521	5.005	0	0	CRABS CLAW (CRC)
MhyYABBY3	0	0	1.379	3.037	0	0	YABBY4 (YAB4)
MhyYABBY4	0	0	0.666	0	0	0	YABBY4 (YAB4)
MhyYABBY7	4.198	5.726	2.369	2.915	0.106	0	YABBY5 (YAB5)
MhyYABBY5	0.594	0.487	2.828	7.771	0	0	YABBY1 (YAB1/FIL)
MhyYABBY6	0	0.108	0	0	0.106	0	YABBY1 (YAB1/FIL)
MhyYABBY2	1.48	0.397	2.483	5.034	0	0	YABBY1 (YAB1/FIL)
[Shulga et al., 2017]:
MhyAP3	2.285	5.078	62.763	56.952	10.699	5.384	APETALA3
MhyPI	0.457	0.133	516.731	363.31	0.466	0.162	PISTILLATA
MhyAG1	0	0	49.035	38.774	0	0.587	AGAMOUS
MhyAG2	0	0.178	18.809	9.981	0	0	AGAMOUS
MhySHP2-1	0	0.3	6.157	8.283	0	0	SHATTERPROOF 2
MhySHP2-2	0.882	0	45.788	28.545	0.301	0.202	SHATTERPROOF 2
MhySTK	0.298	0.111	20.756	15.418	0.205	0	SEEDSTICK
MhyFUL1	2.253	9.033	2.321	7.122	1.973	6.234	FRUITFULL
MhyFUL2-1	9.012	8.144	1.666	0.907	0	0	FRUITFULL
MhyFUL2-2	20.703	16.133	2.003	3.603	0.247	0.253	FRUITFULL
MhyFUL2-3	5.526	9.055	5.559	7.337	1.192	3.471	FRUITFULL
MhySEP3	19.279	66.299	105.95	115.185	0	0.334	SEPALLATA 3
MhySEP2	0.606	0.367	20.428	18.205	0.164	0.445	SEPALLATA 2
[Shchennikova et al., 2017]:
MhyWUS1	0	0	1.273	3.518	0	0.405	WUS
MhyWUS2	0	0	0.402	3.636	0	0	WUS
MhyWOX2	1.073	0.411	3.107	0.17	2.562	0.243	WOX2
MhyWOX4	0	0	0.262	0	20.823	36.998	WOX4
MhyWOX13	15.633	16.822	12.409	15.157	17.988	12.488	WOX13

## Sheet: Table 3
Table 3. MhyYABBYs characteristics
												Normalized number of MhyYABBYs transcripts in transcriptomes
YABBY-like transcript	Gene	GenBank Accession Number	mRNA	L	CDS	L, nt	start	end	protein	L, aa	A. thaliana homologue	bract1	bract2	flower1	flower2	root & bud	Haustoria-root	comment
MhyYABBY1	MhyCRC	KX712839	TCTTAACATGGTGCACCCACTACCAGGATAGGGGTTCCACAGCTTCTAGGTTAGTAGTAAGTCAGTTTTGTCTGTATACATGTAAAGCTAAAGCGTATCAAGTGGCCGTGCAACTCCCAGAACTGCATAGATTGTTTCCTTTCTTCTTGTTGTTGTTGTGTGAACATGGGTGATAAAGCCTCAATGGATTTGGTTCCACCAGCTGACAATCTATGCTATGTCCGTTGCAACTTCTGCAACACTGTTCTTGCGGTTGGGATACCATGCAAAAGGTTGCTGGATACAGTGACAGTGAAATGCGGCCATTGCAGTAACCTCTCCTTTCTCAGCACAAGACCCCCAACACAAGGGCAATGTTTTGATCATCAAACAAGTTTTCAGGGTTTTGGGCCATTCGGC…	781	ATGGGTGATAAAGCCTCAATGGATTTGGTTCCACCAGCTGACAATCTATGCTATGTCCGTTGCAACTTCTGCAACACTGTTCTTGCGGTTGGGATACCATGCAAAAGGTTGCTGGATACAGTGACAGTGAAATGCGGCCATTGCAGTAACCTCTCCTTTCTCAGCACAAGACCCCCAACACAAGGGCAATGTTTTGATCATCAAACAAGTTTTCAGGGTTTTGGGCCATTCGGCAGTGAAATGAACAAGGGACAGTCTTCTTCATCATCTTCAAGCGAGCCACTCTCCCCTAGAGCACCTTTTGTTGTGAAACCACCTGAGAAGAAACACAGGCTCCCATCTGCCTACAACCGATTCATGAAGGAGGAGATACAGCGCATCAAAGCGGCCAATCCTGAG…	502	166	666	MGDKASMDLVPPADNLCYVRCNFCNTVLAVGIPCKRLLDTVTVKCGHCSNLSFLSTRPPTQGQCFDHQTSFQGFGPFGSEMNKGQSSSSSSSEPLSPRAPFVVKPPEKKHRLPSAYNRFMKEEIQRIKAANPEIPHREAFSAAAKNWARYIPNSPAGSMSRSSNHD	166	CRABS CLAW (CRC)	0	0	3.521	5.005	0	0
MhyYABBY3	MhyINO1	KX712840	CTCTCTCTCTCTCTCTCTCTCTCTCTCTCTCTCTCTCTCAGGGAAGGATGTCTAACACTACACCGAACCGAGTCTTGGACCTTCAAGAACAGATCTGCTACGTGCAATGCGGTTATTGCACTACCATTTTACTGGTAGGTGTGCCATGTGGTAGTTTGACAATGGTGGTTACAGTAAGATGCGGGCACTGCACCAGCCTCCTCTCTGTCAACATGTTGAAAACCTCTTTTATCCCTCTCCATCTCTTTGCTTCTGTCAGCCAAGATCAGATGCCAAAACAAGTACCTAGTTCTTGTGAAGAAGCAGATGGCGAACATGAAAAGGCATCAGATAGACGGAGCCCATCGCTGGTCATCTCTTCGGATGACGATGAAGAAGACGTTTTAGTCCCAATGAATC…	981	ATGTCTAACACTACACCGAACCGAGTCTTGGACCTTCAAGAACAGATCTGCTACGTGCAATGCGGTTATTGCACTACCATTTTACTGGTAGGTGTGCCATGTGGTAGTTTGACAATGGTGGTTACAGTAAGATGCGGGCACTGCACCAGCCTCCTCTCTGTCAACATGTTGAAAACCTCTTTTATCCCTCTCCATCTCTTTGCTTCTGTCAGCCAAGATCAGATGCCAAAACAAGTACCTAGTTCTTGTGAAGAAGCAGATGGCGAACATGAAAAGGCATCAGATAGACGGAGCCCATCGCTGGTCATCTCTTCGGATGACGATGAAGAAGACGTTTTAGTCCCAATGAATCATATTGTGAATAGGCCACCAGAGAAGAGGCAGCGGGCCCCATCAGCT…	669	48	716	MSNTTPNRVLDLQEQICYVQCGYCTTILLVGVPCGSLTMVVTVRCGHCTSLLSVNMLKTSFIPLHLFASVSQDQMPKQVPSSCEEADGEHEKASDRRSPSLVISSDDDEEDVLVPMNHIVNRPPEKRQRAPSAYNNFIKEEIRRLKGKHPSMTHKEAFSAAAKNWAHFPPIQYKKGEVSCGEGADHAKMSTNCSDAGGEVYVQGNGFHERKAHAFYQDKDTR	222	YABBY4 (YAB4)	0	0	1.379	3.037	0	0
MhyYABBY4	MhyINO2	KX712841	CTCTCTCTCTCTCTCTCTCTCTCTCTCTCTCTCTCTCTCAGGGAAGGATGTCTAACACTACACCGAACCGAGTCTTGGACCTTCAAGAACAGATCTGCTACGTGCAATGCGGTTATTGCACTACCATTTTACTGGTAGGTGTGCCATGTGGTAGTTTGACAATGGTGGTTACAGTAAGATGCGGGCACTGCACCAGCCTCCTCTCTGTCAACATGTTGAAAACCTCTTTTATCCCTCTCCATCTCTTTGCTTCTGTCAGCCAAGATCAGATGCCAAAACAAGTACCTAGTTCTTGTGAAGAAGCAGATGGCGAACATGAAAAGGCATCAGATAGACGGAGCCCATCGCTGGTCATCTCTTCGGATGACGATGAAGAAGACGTTTTAGTCCCAATGAATC…	721	ATGTCTAACACTACACCGAACCGAGTCTTGGACCTTCAAGAACAGATCTGCTACGTGCAATGCGGTTATTGCACTACCATTTTACTGGTAGGTGTGCCATGTGGTAGTTTGACAATGGTGGTTACAGTAAGATGCGGGCACTGCACCAGCCTCCTCTCTGTCAACATGTTGAAAACCTCTTTTATCCCTCTCCATCTCTTTGCTTCTGTCAGCCAAGATCAGATGCCAAAACAAGTACCTAGTTCTTGTGAAGAAGCAGATGGCGAACATGAAAAGGCATCAGATAGACGGAGCCCATCGCTGGTCATCTCTTCGGATGACGATGAAGAAGACGTTTTAGTCCCAATGAATCATATTGTGAATAGGCCACCAGAGAAGAGGCAGCGGGCCCCATCAGCT…	673	48	721	MSNTTPNRVLDLQEQICYVQCGYCTTILLVGVPCGSLTMVVTVRCGHCTSLLSVNMLKTSFIPLHLFASVSQDQMPKQVPSSCEEADGEHEKASDRRSPSLVISSDDDEEDVLVPMNHIVNRPPEKRQRAPSAYNNFIKEEIRRLKGKHPSMTHKEAFSAAAKNWAHFPPIQYKKGEVSCGEGADHAKMSTNCSDAGGEVILTRYSGNEIKCDKLVPVSIPIRT	224	YABBY4 (YAB4)	0	0	0.666	0	0	0	partial sequence, 3'-truncated
MhyYABBY7	MhyYAB5	KX712843	GGGCACTACTATACTGAACCCCTCCCCTTAAGTCCCTCCCCAACCTTTTCTCGTTTACTCTAGCCTTCCCTATAATCTTTGATCACCACTTTGGATCCTATCCCTCCCTACTTTCCCCCCTTCTCTCTCTACAACTTTCTCTAGGCTACATATCTCCACTCTTTATATATTGCACACACGTTTTATAGTTGTTGTGGTATATACCTCATCTTGAAAGCAAGAGACAAGGAGAGTGAGAGAGCGAGAGAACATAATTCTTTTTCCCTTAGTCTTTGTTTGGTTTCCTTTCTTCTTAGTTTCTTTCATATTTCGGAGCTCCAATTTCAACCCAAACATGTCGAGCTGCGCCGATGTGCCGCGGGAGCAACTTTGCTACATACCTTGCAATTTTTGCAACAT…	1202	ATGTCGAGCTGCGCCGATGTGCCGCGGGAGCAACTTTGCTACATACCTTGCAATTTTTGCAACATAGTTCTTGCGGTGAGTGTGCCATGCAGTAGCTTATTTGACACAGTTACCGTCCGATGCGGGCACTGCACCAATCTGTGGTCCGTCAACATGGCAGCTGCCTTCCAATCACTCCAATCCTTTCAGGCACCAAACTATGGTCCTCCGGATTGCAGCATTGATTTTGGTTCATCATCCAAATGCACGAACAACATGACTACGCGACCACCGATCATAGCAAATAACAACGAGGGAAGGGCTGCAAATCGACCTCCGGAGAAGAGACAGAGAGTACCTTCTGCATATAATCAGTTTATAAAAGAAGAGATACAGAGGATCAAGGCAAATAATCCAGAT…	564	335	898	MSSCADVPREQLCYIPCNFCNIVLAVSVPCSSLFDTVTVRCGHCTNLWSVNMAAAFQSLQSFQAPNYGPPDCSIDFGSSSKCTNNMTTRPPIIANNNEGRAANRPPEKRQRVPSAYNQFIKEEIQRIKANNPDISHREAFSTAAKNWAHFPHIHFGLMLETTNQTKLDEVYCTNEIVGLQLKSPLWN	187	YABBY5 (YAB5)	4.198	5.726	2.369	2.915	0.106	0
MhyYABBY5	MhyFIL1	KX712844	TTTATTGACACGTAGCTCTCTCTTACATACTCAAACACTCTCTTTCTCTCTCTTGTAGTCTTGTCTTCATAACTCTCAGGATTCAGGGAAGATCAGATCCAAGGTGGTTAATTTGTCCATCAAACCCGCAGTCACATCGTTCTGTCAATCCGTCAATCAATCAAATCAAAGAGAATCAGTAGTTTGTGAGAAATCAAAACCATCATCATGTCCTCCTCAAATTCTTTTTCACCGGAACACCAAACCCACCCCCACCAGCATCTCTCCCCCTCCTCCTCCGATCAGCTCTGTTACGCTCATTGCGAATTCTGCAACACTGTCCTCGTGGTGAGCGTGCCTTGCTCAAGCTTGTTCAAGACTGCGACGGTTCGATGCGGCCACTGCACCAGTCTCTTTTCT…	1129	ATGTCCTCCTCAAATTCTTTTTCACCGGAACACCAAACCCACCCCCACCAGCATCTCTCCCCCTCCTCCTCCGATCAGCTCTGTTACGCTCATTGCGAATTCTGCAACACTGTCCTCGTGGTGAGCGTGCCTTGCTCAAGCTTGTTCAAGACTGCGACGGTTCGATGCGGCCACTGCACCAGTCTCTTTTCTGTGAACATTCGTGGCCTTCTTCTTCCTCAACCTAACCAACTCCATCATCTTGGCAATTCATTATTTTCCCCTCAGAATCTTCTGGAGGAGATCCGAAGCTCGACCCCAAACTTGTTGATCAACCAGCCTCACCAAAGTGAACCATTCACAGCGGTTCGAGGGTTTGATGACCTTCCTAAGCCCCCGGCGGCTAACAGACCTCCGGAG…	660	208	867	MSSSNSFSPEHQTHPHQHLSPSSSDQLCYAHCEFCNTVLVVSVPCSSLFKTATVRCGHCTSLFSVNIRGLLLPQPNQLHHLGNSLFSPQNLLEEIRSSTPNLLINQPHQSEPFTAVRGFDDLPKPPAANRPPEKRQRVPSAYNRFIKDEIQRIKAGNPDISHREAFSAAAKNWAHFPHIHFGLLPDQPLKKANVRQQEGDDVMMKDGFLAPANVGVSPY	219	YABBY1 (YAB1/FIL)	0.594	0.487	2.828	7.771	0	0
MhyYABBY6	MhyFIL2	KX712845	GATAAGTCTCTCCCTCTCTCACTCCCCCCCTCCCTCTTCTCTCTCTTTTGTAGTCTTGTCTCAGCAATCAGGGAAGATCAGATACAAATTTGGTTAATCTGTCCATCAAACCCACAGAGTCACATCGCCCAGTCAATCCATCAATCAATCAAATCAAAAAGAATTGTGAGAAATCAAAACCATCATCATGTCCTCCTCAAATTCTTATTCACCGGACCACCAAACCCACTCCCACCTCCCCCACTCCTCCTCCGACCAGCTCTGTTACGTCCAATGCAACATCTGTGACACTGTCCTCGCGGTGAGCGTGCCTTGCTCAAGCTTGTTCAAGACTGCGACGGTTCGATGCGGCCACTGCACCAGTCTCTTTTCTGTGAACATTCGTGGCCTTCTTCTTCC…	1084	ATGTCCTCCTCAAATTCTTATTCACCGGACCACCAAACCCACTCCCACCTCCCCCACTCCTCCTCCGACCAGCTCTGTTACGTCCAATGCAACATCTGTGACACTGTCCTCGCGGTGAGCGTGCCTTGCTCAAGCTTGTTCAAGACTGCGACGGTTCGATGCGGCCACTGCACCAGTCTCTTTTCTGTGAACATTCGTGGCCTTCTTCTTCCTCAACCTAACCAACTCCATCATCTTGGCAATTCATTATTTTCCCCTCAGAATCTTCTGGAGGAGATCCGAAGCTCGACCCCAAACTTGTTGATCAACCAGCCTCACCAAAGTGAACCATTCACAGCGGTTCGAGGGTTTGATGACCTTCCTAAGCCCCCGGCGGCTAACAGACCTCCGGAGAAGAGA…	654	188	841	MSSSNSYSPDHQTHSHLPHSSSDQLCYVQCNICDTVLAVSVPCSSLFKTATVRCGHCTSLFSVNIRGLLLPQPNQLHHLGNSLFSPQNLLEEIRSSTPNLLINQPHQSEPFTAVRGFDDLPKPPAANRPPEKRQRVPSAYNRFIKDEIQRIKAGNPDISHREAFSAAAKNWAHFPHIHFGLLPDQPMKKANVRQQEGDDVMMKDGFLGPANVGVSPY	217	YABBY1 (YAB1/FIL)	0	0.108	0	0	0.106	0
MhyYABBY2	MhyFIL3	KX712846	CATCATGTCCTCCTCAAATTCTTATTCACCGGACCACCAAACCCACTCCCACCTCCCCCACTCCTCCTCCGACCAGCTCTGTTACGTCCAATGCAACATCTGTGACACTGTCCTCGCGGTGAGCGTGCCTTGCTCAAGCTTGTTCAAGGCTGTGACGGTTCGATGCGGCCACTGCACCAGTCTCTTGTCTGTGACCATGCCTGGCCTCCTTCTTCCTCAACCTAATCAGCTCCATCATCTTGGCCACTCATTCATTTCCCCTCAGAATCTTTTGGACGAGATCCGAAGCTCATCCCCAAACTTGTTGATCAATCAGCCCCACCCAAATGAATCATTCTCAGCTGTGCGAGGGTTTGATGAGCTTCCTAAGCCCGCAGCTGCTAACAGACCTCCGGAGAA…	672	ATGTCCTCCTCAAATTCTTATTCACCGGACCACCAAACCCACTCCCACCTCCCCCACTCCTCCTCCGACCAGCTCTGTTACGTCCAATGCAACATCTGTGACACTGTCCTCGCGGTGAGCGTGCCTTGCTCAAGCTTGTTCAAGGCTGTGACGGTTCGATGCGGCCACTGCACCAGTCTCTTGTCTGTGACCATGCCTGGCCTCCTTCTTCCTCAACCTAATCAGCTCCATCATCTTGGCCACTCATTCATTTCCCCTCAGAATCTTTTGGACGAGATCCGAAGCTCATCCCCAAACTTGTTGATCAATCAGCCCCACCCAAATGAATCATTCTCAGCTGTGCGAGGGTTTGATGAGCTTCCTAAGCCCGCAGCTGCTAACAGACCTCCGGAGAAGAGA…	654	5	658	MSSSNSYSPDHQTHSHLPHSSSDQLCYVQCNICDTVLAVSVPCSSLFKAVTVRCGHCTSLLSVTMPGLLLPQPNQLHHLGHSFISPQNLLDEIRSSSPNLLINQPHPNESFSAVRGFDELPKPAAANRPPEKRQRVPSAYNRFIKDEIQRIKAGNPDISHREAFSAAAKNWAHFPHIHFGLLPDQPMKKANVRQQEGDDVMMKDGFLGPANVGVSPY	217	YABBY1 (YAB1/FIL)	1.48	0.397	2.483	5.034	0	0

## Sheet: Table 4
Table 4. Estimates of evolutionary divergence between nucleotide sequences of MhyYABBY genes
The number of base substitutions per site from between sequences are shown. Standard error estimate(s) are shown below the diagonal and were obtained by a bootstrap procedure (500 replicates). Analyses were conducted using the Maximum Composite Likelihood model [1]. The rate variation among sites was modeled with a gamma distribution (shape parameter = 1). The differences in the composition bias …
1. Tamura K., Nei M., and Kumar S. (2004). Prospects for inferring very large phylogenies by using the neighbor-joining method. Proceedings of the National Academy of Sciences (USA) 101:11030-11035.
2. Tamura K. and Kumar S. (2002). Evolutionary distance estimation under heterogeneous substitution pattern among lineages Molecular Biology and Evolution 19:1727-1736.
3. Kumar S., Stecher G., and Tamura K. (2016). MEGA7: Molecular Evolutionary Genetics Analysis version 7.0 for bigger datasets.Molecular Biology and Evolution 33:1870-1874.
Species 1	Species 2	Distance	Std. Err
MhyYAB5	MhyYAB6	0.0422122	0.010103
MhyYAB5	MhyYAB2	0.106157	0.0179503
MhyYAB6	MhyYAB2	0.0569419	0.0119593
MhyYAB5	MhyYAB7	0.71043	0.0867482
MhyYAB6	MhyYAB7	0.700824	0.0861014
MhyYAB2	MhyYAB7	0.699309	0.0863751
MhyYAB5	MhyYAB1	1.0542	0.133869
MhyYAB6	MhyYAB1	1.0151	0.127751
MhyYAB2	MhyYAB1	1.07154	0.138676
MhyYAB7	MhyYAB1	1.04506	0.132378
MhyYAB5	MhyYAB3	1.08298	0.149691
MhyYAB6	MhyYAB3	1.12577	0.153693
MhyYAB2	MhyYAB3	1.10702	0.153077
MhyYAB7	MhyYAB3	1.32046	0.186948
MhyYAB1	MhyYAB3	1.76414	0.26779
MhyYAB5	MhyYAB4	1.08298	0.149691
MhyYAB6	MhyYAB4	1.12577	0.153693
MhyYAB2	MhyYAB4	1.10702	0.153077
MhyYAB7	MhyYAB4	1.32046	0.186948
MhyYAB1	MhyYAB4	1.76414	0.26779
MhyYAB3	MhyYAB4	0	0

## Sheet: Table 5
Table 5. Estimates of evolutionary divergence between amino acid sequences of MhyYABBY proteins
The number of amino acid substitutions per site from between sequences are shown. Standard error estimate(s) are shown below the diagonal and were obtained by a bootstrap procedure (500 replicates). Analyses were conducted using the Equal Input model [1]. The rate variation among sites was modeled with a gamma distribution (shape parameter = 1). The differences in the composition bias among seque…
1. Tajima F. and Nei M. (1984). Estimation of evolutionary distance between nucleotide sequences. Molecular Biology and Evolution 1:269-285.
2. Tamura K. and Kumar S. (2002). Evolutionary distance estimation under heterogeneous substitution pattern among lineages Molecular Biology and Evolution 19:1727-1736.
3. Kumar S., Stecher G., and Tamura K. (2016). MEGA7: Molecular Evolutionary Genetics Analysis version 7.0 for bigger datasets.Molecular Biology and Evolution 33:1870-1874.
Species 1	Species 2	Distance	Std. Err
MhYAB5	MhYAB6	0.0688103	0.0226123
MhYAB5	MhYAB2	0.19331	0.0419587
MhYAB6	MhYAB2	0.10715	0.0286208
MhYAB5	MhYAB7	0.787628	0.133071
MhYAB6	MhYAB7	0.766772	0.126811
MhYAB2	MhYAB7	0.766634	0.126904
MhYAB5	MhYAB1	1.40631	0.239989
MhYAB6	MhYAB1	1.32995	0.225695
MhYAB2	MhYAB1	1.37007	0.235886
MhYAB7	MhYAB1	1.09603	0.185978
MhYAB5	MhYAB3	1.40357	0.240596
MhYAB6	MhYAB3	1.32763	0.231746
MhYAB2	MhYAB3	1.25615	0.218249
MhYAB7	MhYAB3	1.39936	0.242711
MhYAB1	MhYAB3	2.01305	0.380975
MhYAB5	MhYAB4	1.40357	0.240596
MhYAB6	MhYAB4	1.32763	0.231746
MhYAB2	MhYAB4	1.25615	0.218249
MhYAB7	MhYAB4	1.39936	0.242711
MhYAB1	MhYAB4	2.01305	0.380975
MhYAB3	MhYAB4	0	0

## Sheet: Table 6
Table 6. Set of YABBY orthologues from different plant species used for MEME-mediated identification of clade-specific conserved motifs
MhyYABBY	Name of YAB-orthologue	GB Accession	Plant species	Lineage	Motifs presence (+)
					FIL-H	FIL-I
MhyFIL1/2/3		KX712844-KX712846	Monotropa hypopitys	Asterids	+	+
	AtrFIL	BAD72170	Amborella trichopoda	Amborella
	PtaYAB	DR100835	Pinus taeda	gymnosperms
	PglYAB	BT115385	Picea glauca	gymnosperms
	PsiYAB	EF086340	Picea sitchensis	gymnosperms
	PdaYAB4	XP_008787013	Phoenix dactylifera	Monocot		+
	EguYAB4	XP_010933715	Elaeis guineensis	Monocot		+
	MacYAB4	XP_009411506	Musa acuminata	Monocot		+
	ObrYAB4	XP_006647599	Oryza brachyantha	Monocot
	FIL	AF136538	Arabidopsis thaliana	Rosids		+
	YAB3	AF136540	Arabidopsis thaliana	Rosids		+
	VviYAB1	XP_010661657	Vitis vinifera	Rosids	+	+
	TcaYAB1	XP_007052113	Theobroma cacao	Rosids	+	+
	PtrAFO	XP_002320712	Populus trichocarpa	Rosids	+	+
	JcuYAB1	XP_012083613	Jatropha curcas	Rosids	+	+
	GraYAB1	XP_012483031	Gossypium raimondii	Rosids	+	+
	MesYAB1	OAY59979	Manihot esculenta	Rosids	+	+
	EguYAB1	XP_012843575	Erythranthe guttata	Asterids	+	+
	AchYAB1	FG487543	Actinidia chinensis	Asterids	+	+
	CDM51	AY173066	Chrysanthemum morifolium	Asterids	+	+
	CsiFIL	FS955987	Camellia sinensis	Asterids	+	+
	SpuFIL	BAQ19377	Sarracenia purpurea	Asterids	+	+
	CcaFIL	CDP19940	Cynara Cardunculus	Asterids	+	+
	SinYAB1	XP_011090395	Sesamum indicum	Asterids	+	+
	GRAMINIFOLIA	AAS10177	Antirrhinum majus	Asterids	+	+
	NsiYAB1	XP_009793076	Nicotiana sylvestris	Asterids	+	+
	CanYAB1	XP_016545580	Capsicum annuum	Asterids	+	+
	PhyYAB1	ACA64096	Petunia hybrida	Asterids	+	+
					YAB5-Cm
MhyYAB5		KX712843	Monotropa hypopitys	Asterids	+
	AtrYAB5	NP_001292760	Amborella trichopoda	Amborella
	PtaYAB	DR100835	Pinus taeda	gymnosperms
	PglYAB	BT115385	Picea glauca	gymnosperms
	PsiYAB	EF086340	Picea sitchensis	gymnosperms
	PdaYAB2	XP_008778120	Phoenix dactylifera	Monocot
	MacYAB2	XP_009407727	Musa acuminata	Monocot
	EguYAB2	XP_010905004	Elaeis guineensis	Monocot
	YAB5	NP_850081	Arabidopsis thaliana	Rosids	+
	VviYAB5	XP_002285328	Vitis vinifera	Rosids	+
	MesYAB5	OAY31703	Manihot esculenta	Rosids	+
	PtrYAB5	XP_002308074	Populus trichocarpa	Rosids	+
	JcuYAB5	XP_012078813	Jatropa curcas	Rosids	+
	TcaYAB5	XP_007013479	Theobroma cacao	Rosids	+
	RcoYAB5	XP_002527201	Ricinus communis	Rosids	+
	CsiYAB5	KDO80208	Citrus sinensis	Rosids	+
	PmuYAB5	XP_008242786	Prunus mume	Rosids	+
	GhiYAB5	XP_016754541	Gossipium hirsutum	Rosids	+
	MnoYAB5	XP_010105229	Morus notabilis	Rosids	+
	NtoYAB5	XP_009622268	Nicotiana tomentosiformis	Asterids	+
	NtaYAB5	XP_016446776	Nicotiana tabacum	Asterids	+
	NsyYAB5	XP_009785258	Nicotiana sylvestris	Asterids	+
	CanYAB5	XP_016579962	Capsicum annuum	Asterids	+
	StuYAB5	XP_006358281	Solanum tuberosum	Asterids	+
					CRC-E
MhyCRC		KX712839	Monotropa hypopitys	Asterids	+
	AtrCRC	AJ877257	Amborella trichopoda	Amborella
	PtaYAB	DR100835	Pinus taeda	gymnosperms
	PglYAB	BT115385	Picea glauca	gymnosperms
	PsiYAB	EF086340	Picea sitchensis	gymnosperms
	DL	XP_010936439	Elaeis guineensis	Monocot
	LloYAB	ABP35569	Lilium longiflorum	Monocot
	BdiCRC	XP_010228969	Brachypodium distachyon	Monocot
	TaeDL	BAH83538	Triticum aestivum	Monocot
	CRC	AF132606	Arabidopsis thaliana	Rosids	+
	VviCRC	XP_010650015	Vitis vinifera	Rosids	+
	JcuCRC	XP_012067816	Jatropa curcas	Rosids	+
	RcoCRC	EEF50724	Ricinus communis	Rosids	+
	MesCRC	OAY59354	Manihot esculenta	Rosids	+
	PvuCRC	XP_007153487	Phaseolus vulgaris	Rosids	+
	GmaCRC	XP_003520126	Glycin max	Rosids	+
	TcaCRC	XP_007045805	Theobroma cacao	Rosids	+
	EgrCRC	XP_010046616	Eucalyptus grandis	Rosids	+
	CsiCRC	XP_006484236	Citrus sinensis	Rosids	+
	CarCRC	XP_004509753	Cicer arietinum	Rosids	+
	MtrCRC	XP_003614201	Medicago truncatula	Rosids	+
	PmuCRC	XP_016652158	Prunus mume	Rosids	+
	NtaCRC	XP_016437575	Nicotiana tabacum	Asterids	+
	StuCRC	XP_006348666	Solanum tuberosum	Asterids	+
	PhyCRC	AAW83048	Petunia hybrida	Asterids	+
	SlyCRC	XP_004239032	Solanum lycopersicum	Asterids
	AmaCRC	AAS10180	Antirrhinum majus	Asterids
	CanCRC	XP_016546797	Capsicum annuum	Asterids	+
	EguCRC	XP_012847547	Erythranthe guttata	Asterids
					INO-B	INO-C	INO-D
MhyINO1/2		KX712840-KX712841	Monotropa hypopitys	Asterids	+	+	+
	AtrYAB5	XP_006840679	Amborella trichopoda	Amborella	+
	PtaYAB	DR100835	Pinus taeda	gymnosperms
	PglYAB	BT115385	Picea glauca	gymnosperms
	PsiYAB	EF086340	Picea sitchensis	gymnosperms
	PdaYAB7	XP_008812180	Phoenix dactylifera	Monocot	+
	EguYAB7	XP_010940212	Elaeis guineensis	Monocot	+
	MacYAB7	XP_009402010	Musa acuminata	Monocot	+
	ZmaYAB2	KMZ67548	Zostera marina	Monocot
	INO	AF195047	Arabidopsis thaliana	Rosids	+	+
	GraYAB4	XP_012467406	Gossypium raimondii	Rosids	+	+
	CsiYAB4	XP_006483897	Citrus sinensis	Rosids	+	+
	ZjuYAB4	XP_015894702	Ziziphus jujuba	Rosids	+	+
	JcuYAB4	XP_012085422	Jatropha curcas	Rosids	+	+
	VviYAB4	XP_010651538	Vitis vinifera	Rosids	+	+
	MdoYAB4	XP_008389678	Makus domestica	Rosids	+	+
	PmuYAB4	XP_008221876	Prunus mume	Rosids	+	+
	MnoYAB4	XP_010100436	Morus notabilis	Rosids	+	+
	TcaYAB4	XP_007044698	Theobroma cacao	Rosids	+	+
	MesYAB4	OAY32567	Manihot esculenta	Rosids	+	+
	VanYAB4	XP_017427094	Vigna angularis	Rosids	+	+
	IniINO	AAT42250	Impatiens niamniamensis	Asterids		+
	NsyYAB4	XP_009799428	Nicotiana sylvestris	Asterids	+	+
	SinYAB4	XP_011087090	Sesamum indicum	Asterids	+	+
	DcaYAB4	KZN06237	Daucus carota	Asterids	+	+
	AmaINO	AAS10181	Antirrhinum majus	Asterids	+	+
	CanYAB4	XP_016546914	Capsicum annuum	Asterids		+
	EguYAB4	XP_012848044	Erythranthe guttata	Asterids		+
	CcaYAB4	KVH95555	Cynara Cardunculus	Asterids		+
	SpeYAB4	XP_015075232	Solanum pennellii	Asterids	+		+
	SlyYAB4	XP_010321151	Solanum lycopersicum	Asterids			+

## Sheet: Table 7
Table 7 The significance (p-value) of qRT-PCR results for one gene expression between pinesap tissues
Unpaired t test with Welch's correction
Significantly different if P-value < 0.05
The Bonferroni correction: If any of the t-tests in the list has p≤0.05/number of t-tests in the list, then the null hypothesis is rejected, i.e. the difference is significant. 0.05/3 = 0.017. P-values ≤ 0.017 (see violet highligths)
	P value	FLOWER	BRACT	ROOT
MhyCRC	FLOWER		0,0149*	0,0149*	Flower-specific MhyCRC expression differs significantly from that in bracts and roots.
	BRACT			0.0297
	ROOT
	P value	FLOWER	BRACT	ROOT
MhyINO1	FLOWER		0,0106*	0,0107*	Flower-specific MhyINO1 expression differs significantly from that in other analyzed tissues.
	BRACT			0.032
	ROOT
	P value	FLOWER	BRACT	ROOT
MhyINO2	FLOWER		0.0419	0.0287	MhyINO2 expression is similar between tissues.
	BRACT			0.0292
	ROOT
	P value	FLOWER	BRACT	ROOT
MhyFIL3	FLOWER		0.025	0,0032*	MhyFIL3 expression is similar in bracts and flowers, but is absent in roots.
	BRACT			0,0056*
	ROOT
	P value	FLOWER	BRACT	ROOT
MhyYAB5	FLOWER		0,0068*	0,003*	MhyYAB5 expression differs significantly between tissues.
	BRACT			0,0007*
	ROOT
